# Supplementary material for: An unexpected role of Nogo-A as regulator of tooth enamel formation
Source: PubMed Central journal article supplement (PMC11490607; doi:10.1038/s41368-024-00323-x), 2024-10-20
Supplement: 41368_2024_323_MOESM2_ESM.pdf [file 41368_2024_323_MOESM2_ESM.pdf]

NogoA\_interactome

| Accession | Species | Protein Name                                                                                               |             |
|-----------|---------|------------------------------------------------------------------------------------------------------------|-------------|
| 1433B     | MOUSE   | 14-3-3 protein beta/alpha OS=Mus musculus GN=Ywhab PE=1 SV=3                                               |             |
| 1433E     | MOUSE   | 14-3-3 protein epsilon OS=Mus musculus GN=Ywhae PE=1 SV=1                                                  |             |
| 1433F     | MOUSE   | 14-3-3 protein eta OS=Mus musculus GN=Ywhah PE=1 SV=2                                                      |             |
| 1433G     | MOUSE   | 14-3-3 protein gamma OS=Mus musculus GN=Ywhag PE=1 SV=2                                                    |             |
| 1433T     | MOUSE   | 14-3-3 protein theta OS=Mus musculus GN=Ywhaq PE=1 SV=1                                                    |             |
| 1433Z     | MOUSE   | 14-3-3 protein zeta/delta OS=Mus musculus GN=Ywhaz PE=1 SV=1                                               |             |
| ACTN2     | MOUSE   | Alpha-actinin-2 OS=Mus musculus GN=Actn2 PE=1 SV=2                                                         |             |
| ADT1      | MOUSE   | ADP/ATP translocase 1 OS=Mus musculus GN=Slc25a4 PE=1 SV=4                                                 |             |
| ADT2      | MOUSE   | ADP/ATP translocase 2 OS=Mus musculus GN=Slc25a5 PE=1 SV=3                                                 |             |
| AN32A     | MOUSE   | Acidic leucine-rich nuclear phosphoprotein 32 family member A OS=Mus musculus GN=Anp32a PE=1 SV=1          |             |
| AP2B1     | MOUSE   | AP-2 complex subunit beta OS=Mus musculus GN=Ap2b1 PE=1 SV=1                                               |             |
| AP3B1     | MOUSE   | AP-3 complex subunit beta-1 OS=Mus musculus GN=Ap3b1 PE=1 SV=2                                             |             |
| AT2A2     | MOUSE   | Sarcoplasmic/endoplasmic reticulum calcium ATPase 2 OS=Mus musculus GN=Atp2a2 PE=1 SV=2                    |             |
| ATPG      | MOUSE   | ATP synthase subunit gamma, mitochondrial OS=Mus musculus GN=Atp5a1 PE=1 SV=1                              |             |
| BCLF1     | MOUSE   | Bcl-2-associated transcription factor 1 OS=Mus musculus GN=Bclaf1 PE=1 SV=2                                |             |
| BGH3      | MOUSE   | Transforming growth factor-beta-induced protein ig-h3 OS=Mus musculus GN=Tgfb1 PE=1 SV=1                   |             |
| CAPR1     | MOUSE   | Caprin-1 OS=Mus musculus GN=Caprin1 PE=1 SV=2                                                              |             |
| CLH1      | MOUSE   | Clastrin heavy chain 1 OS=Mus musculus GN=Cltc PE=1 SV=3                                                   |             |
| CO3       | MOUSE   | Complement C3 OS=Mus musculus GN=C3 PE=1 SV=3                                                              |             |
| CO6A1     | MOUSE   | Collagen alpha-1(VI) chain OS=Mus musculus GN=Col6a1 PE=1 SV=1                                             |             |
| CO6A2     | MOUSE   | Collagen alpha-2(VI) chain OS=Mus musculus GN=Col6a2 PE=1 SV=3                                             |             |
| COEA1     | MOUSE   | Collagen alpha-1(XIV) chain OS=Mus musculus GN=Col14a1 PE=1 SV=2                                           |             |
| COHA1     | MOUSE   | Collagen alpha-1(XVII) chain OS=Mus musculus GN=Col17a1 PE=1 SV=3                                          |             |
| COPA      | MOUSE   | Coatomer subunit alpha OS=Mus musculus GN=Copa PE=1 SV=2                                                   |             |
| CTNB1     | MOUSE   | Catenin beta-1 OS=Mus musculus GN=Ctnnb1 PE=1 SV=1                                                         |             |
| DDX1      | MOUSE   | ATP-dependent RNA helicase DDX1 OS=Mus musculus GN=Ddx1 PE=1 SV=1                                          |             |
| DDX21     | MOUSE   | Nucleolar RNA helicase 2 OS=Mus musculus GN=Ddx21 PE=1 SV=3                                                |             |
| DDX46     | MOUSE   | Probable ATP-dependent RNA helicase DDX46 OS=Mus musculus GN=Ddx46 PE=1 SV=2                               |             |
| DESM      | MOUSE   | Desmin OS=Mus musculus GN=Des PE=1 SV=3                                                                    |             |
| DHX15     | MOUSE   | Pre-mRNA-splicing factor ATP-dependent RNA helicase DHX15 OS=Mus musculus GN=Dhx15 PE=1 SV=2               |             |
| DHX30     | MOUSE   | Putative ATP-dependent RNA helicase DHX30 OS=Mus musculus GN=Dhx30 PE=1 SV=1                               |             |
| DHX9      | MOUSE   | ATP-dependent RNA helicase A OS=Mus musculus GN=Dhx9 PE=1 SV=2                                             |             |
| ECHA      | MOUSE   | Trifunctional enzyme subunit alpha                                                                         |             |
| ECHB      | MOUSE   | Trifunctional enzyme subunit beta                                                                          |             |
| EF2       | MOUSE   | Elongation factor 2 OS=Mus musculus GN=Eef2 PE=1 SV=2                                                      |             |
| EIF3L     | MOUSE   | Eukaryotic translation initiation factor 3 subunit L OS=Mus musculus GN=EIF3L PE=1 SV=1                    |             |
| ELAV1     | MOUSE   | ELAV-like protein 1 OS=Mus musculus GN=Elavl1 PE=1 SV=2                                                    |             |
| EMIL1     | MOUSE   | EMILIN-1 OS=Mus musculus GN=Emilin1 PE=1 SV=1                                                              |             |
| F120A     | MOUSE   | Constitutive activator of PPAR-gamma-like protein 1 OS=Mus musculus GN=FAM120A PE=1 SV=2                   |             |
| FBN1      | MOUSE   | Fibrillin-1 OS=Mus musculus GN=Fbn1 PE=1 SV=2                                                              |             |
| FINC      | MOUSE   | Fibronectin OS=Mus musculus GN=Fn1 PE=1 SV=4                                                               |             |
| FLNB      | MOUSE   | Filamin-B OS=Mus musculus GN=Flnb PE=1 SV=3                                                                |             |
| FMR1      | MOUSE   | Synaptic functional regulator FMR1 OS=Mus musculus GN=Fmr1 PE=1 SV=1                                       |             |
| FXR1      | MOUSE   | Fragile X mental retardation syndrome-related protein 1 OS=Mus musculus GN=Fxr1 PE=1 SV=2                  |             |
| GTF2I     | MOUSE   | General transcription factor II-I OS=Mus musculus GN=Gtf2i PE=1 SV=3                                       |             |
| H10       | MOUSE   | Histone H1.0 OS=Mus musculus GN=H1f0 PE=2 SV=4                                                             |             |
| H12       | MOUSE   | Histone H1.2 OS=Mus musculus GN=Hist1h1c PE=1 SV=2                                                         |             |
| H2AV      | MOUSE   | Histone H2A.V OS=Mus musculus GN=H2afv PE=1 SV=3                                                           |             |
| H2B1B     | MOUSE   | Histone H2B type 1-B OS=Mus musculus GN=Hist1h2bb PE=1 SV=3                                                |             |
| HNRDL     | MOUSE   | Heterogeneous nuclear ribonucleoprotein D-like OS=Mus musculus GN=Hnrpdl PE=1 SV=1                         |             |
| HNRL2     | MOUSE   | Heterogeneous nuclear ribonucleoprotein U-like protein 2 OS=Mus musculus GN=Hnrpdl2 PE=1 SV=2              |             |
| HNRPC     | MOUSE   | Heterogeneous nuclear ribonucleoproteins C1/C2 OS=Mus musculus GN=Hnrpc PE=1 SV=1                          |             |
| HP1B3     | MOUSE   | Heterochromatin protein 1-binding protein 3 OS=Mus musculus GN=Hp1bp3 PE=1 SV=1                            |             |
| HS90A     | MOUSE   | Heat shock protein HSP 90-alpha OS=Mus musculus GN=Hsp90aa1 PE=1 SV=4                                      |             |
| HS90B     | MOUSE   | Heat shock protein HSP 90-beta OS=Mus musculus GN=Hsp90ab1 PE=1 SV=3                                       |             |
| HSP7C     | MOUSE   | Heat shock cognate 71 kDa protein OS=Mus musculus GN=Hspa8 PE=1 SV=1                                       |             |
| HVM27     | MOUSE   | Ig heavy chain V-III region A4 OS=Mus musculus PE=1 SV=1                                                   |             |
| HVM36     | MOUSE   | Ig heavy chain V region 441 OS=Mus musculus PE=4 SV=1                                                      |             |
| IF4A1     | MOUSE   | Eukaryotic initiation factor 4A-I OS=Mus musculus GN=If4a1 PE=1 SV=1                                       |             |
| IF4A3     | MOUSE   | Eukaryotic initiation factor 4A-III OS=Mus musculus GN=If4a3 PE=1 SV=3                                     |             |
| IF4G1     | MOUSE   | Eukaryotic translation initiation factor 4 gamma 1 OS=Mus musculus GN=If4g1 PE=1 SV=1                      |             |
| ILF3      | MOUSE   | Interleukin enhancer-binding factor 3 OS=Mus musculus GN=Ilf3 PE=1 SV=2                                    |             |
| KCD12     | MOUSE   | BTB/POZ domain-containing protein KCTD12 OS=Mus musculus GN=Kctd12 PE=1 SV=1                               |             |
| KHDR1     | MOUSE   | KH domain-containing                                                                                       | signal tran |
| KV5A3     | MOUSE   | Ig kappa chain V-V region K2 (Fragment) OS=Mus musculus PE=1 SV=1                                          |             |
| KV5AB     | MOUSE   | Ig kappa chain V-V region HP R16.7 OS=Mus musculus PE=1 SV=1                                               |             |
| LAMB3     | MOUSE   | Laminin subunit beta-3 OS=Mus musculus GN=Lamb3 PE=1 SV=2                                                  |             |
| LMNB1     | MOUSE   | Lamin-B1 OS=Mus musculus GN=Lmnb1 PE=1 SV=3                                                                |             |
| LYRIC     | MOUSE   | Protein LYRIC OS=Mus musculus GN=Mtdh PE=1 SV=1                                                            |             |
| MAP4      | MOUSE   | Microtubule-associated protein 4 OS=Mus musculus GN=Map4 PE=1 SV=3                                         |             |
| MATR3     | MOUSE   | Matrin-3 OS=Mus musculus GN=Matr3 PE=1 SV=1                                                                |             |
| MBB1A     | MOUSE   | Myb-binding protein 1A OS=Mus musculus GN=Mybbp1a PE=1 SV=2                                                |             |
| MPCP      | MOUSE   | Phosphate carrier protein                                                                                  |             |
| MYL6      | MOUSE   | Myosin light polypeptide 6 OS=Mus musculus GN=Myf6 PE=1 SV=3                                               |             |
| MYO1B     | MOUSE   | Unconventional myosin-Ib OS=Mus musculus GN=Myo1b PE=1 SV=3                                                |             |
| NCOA5     | MOUSE   | Nuclear receptor coactivator 5 OS=Mus musculus GN=Ncoa5 PE=1 SV=1                                          |             |
| NOP2      | MOUSE   | Probable 28S rRNA (cytosine-C(5))-methyltransferase OS=Mus musculus GN=Nop2 PE=1 SV=1                      |             |
| NOP56     | MOUSE   | Nucleolar protein 56 OS=Mus musculus GN=Nop56 PE=1 SV=2                                                    |             |
| NPM       | MOUSE   | Nucleophosmin OS=Mus musculus GN=Npm1 PE=1 SV=1                                                            |             |
| PA2G4     | MOUSE   | Proliferation-associated protein 2G4 OS=Mus musculus GN=Pa2g4 PE=1 SV=3                                    |             |
| PABP1     | MOUSE   | Polyadenylate-binding protein 1 OS=Mus musculus GN=Pabpc1 PE=1 SV=2                                        |             |
| PCBP1     | MOUSE   | Poly(rC)-binding protein 1 OS=Mus musculus GN=Pcbp1 PE=1 SV=1                                              |             |
| PGAM5     | MOUSE   | Serine/threonine-protein phosphatase PGAM5, mitochondrial OS=Mus musculus GN=Pgam5 PE=1 SV=1               |             |
| PGBM      | MOUSE   | Basement membrane-specific heparan sulfate proteoglycan core protein OS=Mus musculus GN=Hspg2 PE=1 SV=1    |             |
| PHB2      | MOUSE   | Prohibitin-2 OS=Mus musculus GN=Phb2 PE=1 SV=1                                                             |             |
| PININ     | MOUSE   | Pinin OS=Mus musculus GN=Pnn PE=1 SV=4                                                                     |             |
| POSTN     | MOUSE   | Periostin OS=Mus musculus GN=Postn PE=1 SV=2                                                               |             |
| PRDX1     | MOUSE   | Peroxiredoxin-1 OS=Mus musculus GN=Prdx1 PE=1 SV=1                                                         |             |
| PRP19     | MOUSE   | Pre-mRNA-processing factor 19 OS=Mus musculus GN=Prpf19 PE=1 SV=1                                          |             |
| PRP6      | MOUSE   | Pre-mRNA-processing factor 6 OS=Mus musculus GN=Prpf6 PE=1 SV=1                                            |             |
| PRP8      | MOUSE   | Pre-mRNA-processing-splicing factor 8 OS=Mus musculus GN=Prpf8 PE=1 SV=2                                   |             |
| RACK1     | MOUSE   | Receptor of activated protein C kinase 1 OS=Mus musculus GN=Rack1 PE=1 SV=3                                |             |
| RALY      | MOUSE   | RNA-binding protein Raly OS=Mus musculus GN=Raly PE=1 SV=3                                                 |             |
| RBM25     | MOUSE   | RNA-binding protein 25 OS=Mus musculus GN=Rbm25 PE=1 SV=2                                                  |             |
| RBMX      | MOUSE   | RNA-binding motif protein                                                                                  |             |
| RCC2      | MOUSE   | Protein RCC2 OS=Mus musculus GN=Rcc2 PE=1 SV=1                                                             |             |
| RL10      | MOUSE   | 60S ribosomal protein L10 OS=Mus musculus GN=Rpl10 PE=1 SV=3                                               |             |
| RL10A     | MOUSE   | 60S ribosomal protein L10a OS=Mus musculus GN=Rpl10a PE=1 SV=3                                             |             |
| RL13      | MOUSE   | 60S ribosomal protein L13 OS=Mus musculus GN=Rpl13 PE=1 SV=3                                               |             |
| RL13A     | MOUSE   | 60S ribosomal protein L13a OS=Mus musculus GN=Rpl13a PE=1 SV=4                                             |             |
| RL15      | MOUSE   | 60S ribosomal protein L15 OS=Mus musculus GN=Rpl15 PE=2 SV=4                                               |             |
| RL19      | MOUSE   | 60S ribosomal protein L19 OS=Mus musculus GN=Rpl19 PE=1 SV=1                                               |             |
| RL22      | MOUSE   | 60S ribosomal protein L22 OS=Mus musculus GN=Rpl22 PE=1 SV=2                                               |             |
| RL23      | MOUSE   | 60S ribosomal protein L23 OS=Mus musculus GN=Rpl23 PE=1 SV=1                                               |             |
| RL24      | MOUSE   | 60S ribosomal protein L24 OS=Mus musculus GN=Rpl24 PE=1 SV=2                                               |             |
| RL26      | MOUSE   | 60S ribosomal protein L26 OS=Mus musculus GN=Rpl26 PE=1 SV=1                                               |             |
| RL28      | MOUSE   | 60S ribosomal protein L28 OS=Mus musculus GN=Rpl28 PE=1 SV=2                                               |             |
| RL31      | MOUSE   | 60S ribosomal protein L31 OS=Mus musculus GN=Rpl31 PE=1 SV=1                                               |             |
| RL34      | MOUSE   | 60S ribosomal protein L34 OS=Mus musculus GN=Rpl34 PE=1 SV=2                                               |             |
| RL35A     | MOUSE   | 60S ribosomal protein L35a OS=Mus musculus GN=Rpl35a PE=1 SV=2                                             |             |
| RL4       | MOUSE   | 60S ribosomal protein L4 OS=Mus musculus GN=Rpl4 PE=1 SV=3                                                 |             |
| RL6       | MOUSE   | 60S ribosomal protein L6 OS=Mus musculus GN=Rpl6 PE=1 SV=3                                                 |             |
| RL7       | MOUSE   | 60S ribosomal protein L7 OS=Mus musculus GN=Rpl7 PE=1 SV=2                                                 |             |
| RL7A      | MOUSE   | 60S ribosomal protein L7a OS=Mus musculus GN=Rpl7a PE=1 SV=2                                               |             |
| RL8       | MOUSE   | 60S ribosomal protein L8 OS=Mus musculus GN=Rpl8 PE=1 SV=2                                                 |             |
| RMXL1     | MOUSE   | RNA binding motif protein                                                                                  |             |
| RNPS1     | MOUSE   | RNA-binding protein with serine-rich domain 1 OS=Mus musculus GN=Rnps1 PE=1 SV=1                           |             |
| ROA2      | MOUSE   | Heterogeneous nuclear ribonucleoproteins A2/B1 OS=Mus musculus GN=Hnrnpa2b1 PE=1 SV=2                      |             |
| ROA3      | MOUSE   | Heterogeneous nuclear ribonucleoprotein A3 OS=Mus musculus GN=Hnrnpa3 PE=1 SV=1                            |             |
| RPN1      | MOUSE   | Dolichyl-diphosphooligosaccharide--protein glycosyltransferase subunit 1 OS=Mus musculus GN=Rpn1 PE=1 SV=1 |             |
| RRBP1     | MOUSE   | Ribosome-binding protein 1 OS=Mus musculus GN=Rrbp1 PE=1 SV=2                                              |             |
| RS13      | MOUSE   | 40S ribosomal protein S13 OS=Mus musculus GN=Rps13 PE=1 SV=2                                               |             |
| RS16      | MOUSE   | 40S ribosomal protein S16 OS=Mus musculus GN=Rps16 PE=1 SV=4                                               |             |
| RS2       | MOUSE   | 40S ribosomal protein S2 OS=Mus musculus GN=Rps2 PE=1 SV=3                                                 |             |
| RS25      | MOUSE   | 40S ribosomal protein S25 OS=Mus musculus GN=Rps25 PE=1 SV=1                                               |             |
| RS28      | MOUSE   | 40S ribosomal protein S28 OS=Mus musculus GN=Rps28 PE=1 SV=1                                               |             |
| RS4X      | MOUSE   | 40S ribosomal protein S4, X isoform OS=Mus musculus GN=Rps4x PE=1 SV=2                                     |             |
| RS6       | MOUSE   | 40S ribosomal protein S6 OS=Mus musculus GN=Rps6 PE=1 SV=1                                                 |             |
| RS7       | MOUSE   | 40S ribosomal protein S7 OS=Mus musculus GN=Rps7 PE=2 SV=1                                                 |             |
| RS8       | MOUSE   | 40S ribosomal protein S8 OS=Mus musculus GN=Rps8 PE=1 SV=2                                                 |             |
| RS9       | MOUSE   | 40S ribosomal protein S9 OS=Mus musculus GN=Rps9 PE=1 SV=3                                                 |             |
| RTCB      | MOUSE   | tRNA-splicing ligase RtcB homolog OS=Mus musculus GN=RtcB PE=1 SV=1                                        |             |
| RU17      | MOUSE   | U1 small nuclear ribonucleoprotein 70 kDa OS=Mus musculus GN=Snrnp70 PE=1 SV=2                             |             |
| RU2A      | MOUSE   | U2 small nuclear ribonucleoprotein A' OS=Mus musculus GN=Snrpa1 PE=1 SV=2                                  |             |
| RUXE      | MOUSE   | Small nuclear ribonucleoprotein E OS=Mus musculus GN=Snrpe PE=1 SV=1                                       |             |
| SAHH3     | MOUSE   | Putative adenosylhomocysteinase 3 OS=Mus musculus GN=Ahhc3 PE=1 SV=1                                       |             |
| SF3B1     | MOUSE   | Splicing factor 3B subunit 1 OS=Mus musculus GN=Sf3b1 PE=1 SV=1                                            |             |
| SFPQ      | MOUSE   | Splicing factor, proline- and glutamine-rich OS=Mus musculus GN=Sfpq PE=1 SV=1                             |             |
| SMC1A     | MOUSE   | Structural maintenance of chromosomes protein 1A OS=Mus musculus GN=Smc1a PE=1 SV=4                        |             |
| SMCA4     | MOUSE   | Transcription activator BRG1 OS=Mus musculus GN=Smarca4 PE=1 SV=1                                          |             |
| SMD2      | MOUSE   | Small nuclear ribonucleoprotein Sm D2 OS=Mus musculus GN=Snrpd2 PE=1 SV=1                                  |             |
| SMD3      | MOUSE   | Small nuclear ribonucleoprotein Sm D3 OS=Mus musculus GN=Snrpd3 PE=1 SV=1                                  |             |
| SND1      | MOUSE   | Staphylococcal nuclease domain-containing protein 1 OS=Mus musculus GN=Snd1 PE=1 SV=1                      |             |
| SPTB2     | MOUSE   | Spectrin beta chain                                                                                        |             |
| SRRT      | MOUSE   | Serrate RNA effector molecule homolog OS=Mus musculus GN=Srrt PE=1 SV=1                                    |             |
| SRS10     | MOUSE   | Serine/arginine-rich splicing factor 10 OS=Mus musculus GN=Srsf10 PE=1 SV=2                                |             |
| SRSF2     | MOUSE   | Serine/arginine-rich splicing factor 2 OS=Mus musculus GN=Srsf2 PE=1 SV=4                                  |             |
| SRSF4     | MOUSE   | Serine/arginine-rich splicing factor 4 OS=Mus musculus GN=Srsf4 PE=2 SV=1                                  |             |
| SRSF5     | MOUSE   | Serine/arginine-rich splicing factor 5 OS=Mus musculus GN=Srsf5 PE=1 SV=2                                  |             |
| SRSF6     | MOUSE   | Serine/arginine-rich splicing factor 6 OS=Mus musculus GN=Srsf6 PE=1 SV=1                                  |             |
| SYEP      | MOUSE   | Bifunctional glutamate/proline--tRNA ligase OS=Mus musculus GN=Eprs PE=1 SV=4                              |             |
| TBA1A     | MOUSE   | Tubulin alpha-1A chain OS=Mus musculus GN=Tuba1a PE=1 SV=1                                                 |             |
| TBB4B     | MOUSE   | Tubulin beta-4B chain OS=Mus musculus GN=Tubb4b PE=1 SV=1                                                  |             |
| TCP4      | MOUSE   | T-complex protein 1 subunit epsilon II transcriptional coactivator p15 OS=Mus musculus GN=Sub1 PE=1 SV=3   |             |
| TCPD      | MOUSE   | T-complex protein 1 subunit delta OS=Mus musculus GN=Cct4 PE=1 SV=3                                        |             |
| TCPG      | MOUSE   | T-complex protein 1 subunit gamma OS=Mus musculus GN=Cct3 PE=1 SV=1                                        |             |
| TCPH      | MOUSE   | T-complex protein 1 subunit eta OS=Mus musculus GN=Cct7 PE=1 SV=1                                          |             |
| TCPZ      | MOUSE   | T-complex protein 1 subunit zeta OS=Mus musculus GN=Cct6a PE=1 SV=3                                        |             |
| TENA      | MOUSE   | Tenascin OS=Mus musculus GN=Tnc PE=1 SV=1                                                                  |             |
| TR150     | MOUSE   | Thyroid hormone receptor-associated protein 3 OS=Mus musculus GN=Thrap3 PE=1 SV=1                          |             |
| TRA2A     | MOUSE   | Transformer-2 protein homolog alpha OS=Mus musculus GN=Tra2a PE=1 SV=1                                     |             |
| U520      | MOUSE   | U5 small nuclear ribonucleoprotein 200 kDa helicase OS=Mus musculus GN=Snrnp200 PE=1 SV=1                  |             |
| USS1      | MOUSE   | 116 kDa U5 small nuclear ribonucleoprotein component OS=Mus musculus GN=Effud2 PE=1 SV=1                   |             |
| VDAC1     | MOUSE   | Voltage-dependent anion-selective channel protein 1 OS=Mus musculus GN=Vdac1 PE=1 SV=3                     |             |
| VIGLN     | MOUSE   | Vigilin OS=Mus musculus GN=Hdlbp PE=1 SV=1                                                                 |             |
| ZCH18     | MOUSE   | Zinc finger CCCH domain-containing protein 18 OS=Mus musculus GN=Zc3h18 PE=1 SV=1                          |             |
| ZO1       | MOUSE   | Tight junction protein ZO-1 OS=Mus musculus GN=Tjp1 PE=1 SV=2                                              |             |
