# Supplementary material for: An unexpected role of Nogo-A as regulator of tooth enamel formation
Source: PubMed Central journal article supplement (PMC11490607; doi:10.1038/s41368-024-00323-x), 2024-10-20
Supplement: 41368_2024_323_MOESM3_ESM.pdf [file 41368_2024_323_MOESM3_ESM.pdf]

>5 dna:chromosome chromosome:GRCm39:5:88601472:88618800:1  
AGATCCCATCTCAAAGAAAAATGTCGCCTTTAATCCCGGCACTCAGGAGGCAGAGGCAG  
GCGGATTTCTGAGTTTGAGGCCAGCCTGATCGACAAAGTGAGTTCCAGGACAACCAAGGC  
TACACAGAGAAACCTGTCTCGAAAAACAAAAAGAAAAAAAAAAGAAAGAAAGAAAGAA  
AGAAAGAAAGAAAGAAAGAAAGAAAGAAAGAAAGAAAGAAAGAAAGAAAGAAAGAAAGAA  
CTTTACCATCAAGAAAATGAAAATTA AAACTACTTTGAGATCAAAGCAATAACTGACAGT  
AAGACCTGGCAGGAAGTAGTGAAAGGGAAAGCCTTGGTCACTTTTGCTAAGATTGAAAAC  
TGGACAGCCACTACAGAACTCAGTGGGGAGAATCCTTGAAATCTTAAAATAGATCATAGG  
ACCAGCTATACCTCGCTCTGAAATACACTCAATGACTTGATATCCTACTAAGAGATAATT  
GTATTTTGGCACTTTATTACAATAACTAGGGAATAAAAGCAGCCTATATATCCATCAAC  
TGGTGAGTAAATTGAAAAAGTGATATTTACATAATGGAATTCTATTCAGTTGTGAAG  
AAAAATGAAACCATAAAAAATTCGCAAGTAAATGACTAGACAGGAAAACATTATATTGA  
GTAAAGTAGCCTAGACTCAGAAAGACACATGGTTCACATTCTCCCTTACTTTCAACTCCT  
AGATACAAATCTTTAAGTGTATAGTTTGGCATAACCATAGAAGCTGGGAACGTAGAAGGA  
AACCCTGGAGAGGAGAGAGAGCTTTAGGAAGGAGGACAGCAAGACACAGGTGCCATCA  
AGTGACTAGGTTTACAGGCCTACATCAAATGTAATCACAATCCAGTTGGTTGTCCCAGTA  
CAGTCATGCCACTATTGCACCGGTGAGTGCATCTTGCTAGCAAGTCAGTATTGCAACTT  
GTTGGCGTCCAGTGCTGGGTAAGATCATCAGTCCCTTTGGTGGTGGTGGTGGTGGTGGT  
TTGTTTGGTTTTGGTTTTCTCTTTTATTAGAGGTCTGAATATGACTTTTAGCACTACA  
AAAGTTTGACAACAGAGAAGAAGATTCCTGGTCAGCTTGAAATTAATCTTTCTGTGTCT  
ACAACCAAAGTATGTGGTGATGTCTTCAGCAATTCGATCCTAGTATCTATGATGGATAAC  
TAGAAATAATGGCAATAGGCTAAGATACTCGCAGCTCTCTGGAGTCTCTCATAAGAAGGT  
ATCCCATGTGGAGCACTGGGGTTTTCTTCGCAACCTATGTCTTCGGGGAGCAGGATTAAG  
CTTCTTAAATAACATTATTTGAAGCTATTAGGTCTGCAGTTGGGTATGAAGGTGTCTTTC  
TCCCAAAATACCAGCTTCTCAATGTTCCCTATAATTGGTGCAATCTCTACTTTCCAGAA  
GAGTCTACTGAGTCATCCCTTCTTCAGAACTGGTCGTAAATGGATATCCATGTACAAAA  
TCATACCCTAGGATAGACGTAGAGGGCAGAGGTACTCTGTCTATATCCACACCGCTCTTA  
TCTGCTCATGGAGCAAAGCCAGCCATGTTGAAGTATACTTTTTAAGTGACCCAGAGAGA  
CCTTATTAATCTGGCTTGACACTGATGCCTGGTAACTGAGTGTCTAAAGAGGACAGGTAG  
AGTTGTGACCTTAGATTTGTTTGGTTCCAGTAGAATATTCTAAATTATTTTCTCTCCCA  
CAAAGAACATGCATCAAAGATTTTCCATCATTCTTGCCAACTTAAATTTCTTTTTTTTT  
TTTAATTGGTTAACTCCAGACAACCTATCCTTAGATGAAAATACCTAGGAACTCAGAAAG  
GAAAAAAAAAAGAGTACAAAATCTTCAACATCTGGTCTACATTTTCATATTCCATAACAA  
ACCCTAGAGATAATTTGGTGTTCCTCGAGGGTATATGTGTGTTGGTGGGGTGGGGTGT  
GGTGGTGGTAGAAGATTTCTTTTACTACAATAAACATGAGGGTCAGAATCTTGGGAGTGC  
TGGCATTGGGTCACTAGCTTTATCTGCAGATAAACATTTTCACAAAACAGATAATGGCTT  
GTTTTCTACCGTTTACATATATTTCCCGAAGCTCACAAAATGATTGTCTTCAAAGCCCA  
TGTCCATTATCCCTTACTGTGTTCCCTGCAATCAGCTCTCAGAATAAATACAGGGGCTG  
GGTTACAATTTAAAATAATGAGAGCCTGCAGGCCAATGTCCTCACATGCAATACAAGGG  
TGTGGACTAATTGCAGGAGCACAATTTTTTCTGCATTTGCCTCACTTTGATTGGTGGGA  
TTGGCGCTTTAATAAAGTTTTCTGATCTTCCAGAATGAGAGATACAGAGAGAGCCCA  
GGAACAGTCCAGAAAAAAAAAATTAATCTTCTTTTCTTAGAACTGTTTTGATTGGCATCATC  
AGGCCTGGGAGCACAGTGAATGTCAGCATCTAAGGTAAAATGTGATTTTATCATTCCAT  
GTGTTTGCTATAAATCTCTTTTCTGTCTCCAGATAACCTTTACAAAAAGATTTATCT  
TCATTTATCACAAGATGCTGAATAACAGCTTATTTCAACCATTAGAATATTCCAGAAAAT  
ATATTACCATTAACCTAAGAAAATAAACTTATTTGTATGACTTTTTTAAACTATGTTTGT  
GATTATTAGTGATAGTGCTAATTTATAAAAGTAAAGAGGATAAGCACACCTGCTGATCAG  
ATCTGCTTCCATTGAGAGTGAACCTGACAAAATGCATCTCAAGATTATTCATTTTAGGA  
AGGAAAATCACTATCCAAGCAGATAAATACTCAACTTTAGCTTGAAGGCTGAGTTTTG  
ACATGGTTCTGCATTATGACCCAATCATAGTTGTATTTCAAATTCTGAGTTTAAACAAA  
GAATACAATTCTGTAAATGGTGAAGGATGCATTTTATGAAGCAAAGCATAGTGTTTC  
AAGGAATATTCCTGGAGGTTGTTCTTAAACATTCATTCAAATTGCAGCTTCATAAAAATA  
AGTACTCAGATCCATAGTTTGGCTGCTCGTCATTCCATTCTGATAGCCACTGGTTTAGCA  
GCTTTTTGCTTTTGCATTTTAGCACTTTTGCATTTTTGAGTTTTTAACTGATTGTCTT

TGGAAGAACAGCCACACGCTCTTAGAAATATACTTTGACCACTATGAATGCAATTTTGCC  
TGAGGTGATTTTACAACCCAAGTGTGTTTTAGATTCCACTTTTCAAATGAAGGGCCTGA  
TCCTGTTCCTGTCCCTAGTGAAAATGAGCCTCGCCGTGCCGTAAGTCCATCCCTTACCC  
GGGATCTCGGGCTCCTGCATCTGACTACAGCAAACCCAGGGACACTCTGTCCTGACACTT  
CAGGCATGCACTCACTCAGTTTGTAGCTCCCAGTGAGTCAATGGTCACAGTGGCCACATG  
TCAGCCTTATCATCGAAAGGGGATAAGTAAATATAATTTTTCTACTCTAAACAACAATTT  
GGAATATTTCAAAGGCAAATTTTTATGTCTTATGACACTCTTTTAACAGGTAGAAGACTAC  
AGCATCCTAGTTTTATCATGTTTTATTATCAAGTCCTTGCTAGCACTATGAAATCGAAA  
TGAAAAGGAAAAATATCTCTTGGGCAGGGGAGTATATGTCTCTTTATATTAGCAACATT  
ATCACATGGCTATAGACTGTAGTTCCAGTTAAAGCTAGTATTTAGCTGGCACATTTAGCT  
GTTCTACTACCAACAAGAATTTTTAAATGAAAGAAAAATGGAGGCTGGCTCTCTAACTT  
GCCTTTGGATGATAACTGAGACTGGGGTCCGCTTCAGCCATCAATCATCAATCTAAAACA  
TTGGCATTCTCTGAATATACAGTGATCCACACATTAGTAATTTAGAGTCACACTGAACAA  
TGGGGAAATCACGTGTTTCCTAAGTGACTGCCTGTCAGATCAGGTGTTTCTGCTTTTAAAT  
TTTCCATAGGGAATGTATCCTCTGTCTATTCACATCCATGTAATAAATGTTCCCTTTTAA  
CTGGTGACTTGGAGCAGATAGAAATCAGACTACCTTGCCCTGTAGTTAGAGTACTCCAAA  
ATGTGGAAGTGGGCACTTACCAACAAAGGTCAAGGAGGCTGTGCTCTCATAATACCCCG  
AACATCTGAACATCCTCCTGTTACACACACTGTCATGCACACATGCACATAGGCACACAC  
AATCAGTCCCCTTGCTACACAACCTCATCTTTTTCTCTACCAGAAGTGTTTACTGCACAT  
TTTTAGTGCATTTCTTTAACACATAACCCACAATGAATTGTTTAGAAAATTTTGCACTGT  
AATTAAGAAAATGGAGTACTTGCATAAAAAAATTAAGGGTTAAAAAAAAGTACAGGGTG  
TAATACCTTAGCCTCTTACTCCTGAAGGATAATGGCCCCACTGTTCCATACTTGAGGGAT  
GGATGGAGAGGCAGACAGACAGGTACTTTTCAGTATAAATGAAAGAAAAATTACAATACTA  
ACACAACAAAAATGAGGATATCCATGAAATCAGAGAATTCTCAAATCCAATTTTCTAGT  
AGGTAGAGTAACTTATAATTGACCCAGCACATTGGAAGCTGGAATATTGTGAATTAGAA  
GCCAGTTTTGGCTACATAACAAGTTCATACCCAGCCTGAGCTAATTACCAAAACCTTATT  
TAAATAAATGAGTAATTTTTGTTTGAAATTTTAAATTTAATTTCTCTAATTCTATTCT  
TCCAGGCTCCACTCACACTCACACTGGTATCTGTGCTTATTAACATATGAAAATTTAA  
GATGTTTAGAAAGAGAAGTATTTTATAATTTTAAAAGATATTTGTAAATATGTTTATGC  
TTCACAACAGCATCCTACTAAGTACAAGAATACTTTTCATTTAAAGAAAGATCCCCACTA  
TCTGATCTGAACAATTTAAATATATAATTTTATTATTTTATTTATGACATGTGTGTGT  
ACATATGGGTATGTGCACATAAGTGTAGGTCCCCAAAGGTGTCAGAGGCATCAAATCCCC  
TGAGAGCTGTCATTACAGATGGTTATGAGCCACCTGACATGGATACTAGGAACCAAACCC  
AGGACCTCTGGAAGAGCAACAGGGGCTGTAAATGTACCATAAGTCCAGCTCTGATCTAAA  
AAAATTAACAGAGATCCACAAGCTTAACTTAAATAATCATTAAATAATAGCACATAA  
GACTTGTTAAACCTTCTGAATGGGAAGCAAGATAGGTTCTGTATATGATTTTTCTCAAT  
GAATAACCTCATACCATATCCATAACCAAAGCACACCCATTTATAAAAAGCACAAGGA  
AATTCAACTCCTTTGCTTTTACATGTGATCGTATTTATGACTATAAAAATCTTGTGTTTT  
CTTCCCTTCTTTAATTCTCACTGTGAATGTTTCTTTTAAAGCAACATAAAGCTAAGAT  
AAACATACAAAAAATTCTGATGTGAGAGAAAAATTAAGTATAATAATTCCTCCAGA  
TAACTTTAATTCTTCACTTCTATCTGAAAATCCTAGTCATCTGAGTAATAAGCCAATATGG  
CAGCCTCTCCACTTGACATTTCACTTCTGCCGTGACCTCCTACTCCAAACGTACACTTAGA  
GAAGTTTCTCAATAAAGAACTCAAGATCATTATATTTCTATTTAGGCATTTCTCAACA  
ACCTGGGGCTCAAGGCATGGCACCTCCTGGCATGGCTAGTTTGAGCCTTGAGGTATGTAT  
CATCAGAGGCGTGTGTGTGTGTGTGTGTGTGTGTGATTCTATACTAGCATGTCCC  
TGATTGTAGATAAGCATGATGCTTTGTTTCTCAGTTTCCCTATTCCAGAAATCTTTGACT  
ATCATTCCGAAGAAATCTAAAATTGTTGATGACGTTCACTACAACCTTTATCTCATGATTC  
TACTTCATTTTTAAATTCAGAGATATTTTAAAGTTTTAGGACATTCATATGTGAATCAAAG  
CAACTGTAACAATTAATAATAATAATAATAATAATATATATATATATATATATATATAT  
TATATTTTCTGTGTTGAAACCCATTATTCTGTGCTTGGAAACAGCTTACACTTAGTTCTG  
TTGCTTATATCTTAGATGATAAAGTCTCATGACATAAACACACTTGGACACACTTTAGCT  
TTCTAAAACAAAGTGCTATCAGTATCAGTAACATGACTTTATAATTGCTCCTGTACAGGT  
TGCTTTTTTTTTAACTGCAGATCCATAAATAATGCATTTTTTTGTTTTTAAAACCATGGT  
GAAATAGGAAGATTTTATAATGAAGAAGCTAATGAAACACAGATAAATTTACAGTTTTT

TCACAAGGTCAGGCAAGATTTTCATCTGAGTGCAATCAGTACATGTGTGGGCCAGATAGTT  
ATTTACATAGAGGCTAATTTCAATTTAGGTGGTTTTCTCTCAGCTTTTAGCTCAAATTC  
AATACAAGCAACATTCTTTCCATTTAAAAAGTAAATCTAGGCCAGGTGTTACCTATAA  
TCCCAACATCCAGGGAGACTGAAGAGAGGAGGAGGATCATGATTTAGAGACCAACATGGA  
CTGTCCGGGGAGACCCATCTCAGAAGGAAGGAAAGAGGAAAGGAAGGAGGGAAGGGAGAC  
AGGGAGGAAGGGAAGAAGGAAGGAAAAAGAAATTTAAGTGAAGGAAAAAGAACGGGCTGA  
TAAAGCAATAGTCTTACAACGTCCGTGTATTGTATTTGAATAGACTGTTTTCTATGTC  
TCAGTGTGACCCAGATTAAGTATTTTCCATTTAATCAGTGACAAAAGCAAGTGTA  
CTGTTTTCAGACTGAACATGGCAAAGCTACATTTTACATTTCTTTCTTTCCGTAACAATT  
TGTGTCTACTTTAGCTCTATTCAAGTTGCCTTACCCCAAGACTTGTATTGCTATTAATG  
TCATGAGAACTCAGTTGTGTCAAACGGACATCTAACATATGTTAGAGCATTAACTACTT  
TTTCTTATAGACAATGAGACAGTTGGGAAGCTTGCAGGGACTCAACGCACCTTCTCAGGT  
AACTATACGAGATGAATGAGATCTTCATAAACACTTTTTAAAATATTTATTACAACATTG  
ATAGTTTGTAGTTATGACAGCAACAGTACTATAGTTTCTAGAATTTACTTATTAATAGGT  
AAATACCTAAACACTGAGAGAAGAAATGAGTGATTAAGAAAGCCTTAAACAGCCAGGCAT  
GGTGCCACACACCTTTAATCTCATCACTCGGGAGGCAGAGGCAGGCGTATTTCTGAGTTC  
AAGGCCAGCCTGGTCTACAAAGTGAGTTCAGGACAGACAGGGCTATACAGAGAAACCT  
GTCTCAAACAAAAAAATCCTTAAGCAAATAGTGTGATGGTCAAACATGAGCTCCACT  
CCAATAACCCCAATCTTTGGGAGACTGAGACAGGAAGAATGGTTTGAGTTCGCAGTCAGC  
CTGGGCTACACAGTTAATATCAAAGACACATTTTAGTAATATTAATATGTGCTGGCAA  
TGAAAGTAGAATAATATATCCAGTACTCGGGAGCTGATGCACAGAGAATGCAATTCAG  
GCCAAGCTGGGAACATGCTGAAGTATAAGCCTTCTCAGAACACTAACAAAATAAGCCAT  
CAAAATATATACATTGTTACTTTAAGTAAAATAAAATTAATTACTTATTACACTAATAATTTG  
TTAAGTTGTCCCAAACAGAAATTTCTAGAATGATAAATCACCAACAAGTTTTATGGTATAT  
TGTGACATGCCAGAACATAATTTAATTTTGTGGGAAGAGAGATAATTTTGTGGGAAGAG  
AGAATTGGCTTACCCATTCCACACAAACCTGAATTACTTTTGCTTTTGGTTGCTATCTCA  
CAATCCTGAAATGTATGTATGCTTTCTTTGTCTCTGTGAGTATTCTAGACTTGGCTTTGG  
AAAAGCACTTAATAGTTTATGGTTGCACGGACTTCTCCACCGCATAACTCTTTCCCATG  
GATAGGACCAAGGGAACATGAAACCCAGCAGGTAAGCTAATTGCATCCATGTGTTCAAAC  
TCAAGGTTAAGACTTTTTCTACTTTTGTATTACAATAGCAGCAAACACAAATTAGTA  
ATTGACCAAAAACCTCCCTAATACCAAATAAATCAAGTCTATAACTCCTGTTACTTAGG  
GAATATTTTTATTTAAATTTGTAATTTATTTCAAATAGCCTCTGAAAGAAGAGACCTAC  
AATAAAGATATCAGGAATAACAATAAACCTCAAAAATAAAAACAGACTCTAGTCTGGATA  
ACTTTCAATTTAATCAAAATTTCTAATTACCTAAAGACTAATTTCAAATGACAATAATC  
ATCCTGATTGAAAACACAATGAGCCAAACAGGAACCAATATATTAATCTGTCAACTATTA  
TTAATTAGATTCCTAATAAGCATATTATCCAAACTGTGGTCTGGGGGGGAGGGGGGCAG  
AAAATAAGGACATGTTAGAATGGCTCAAAGGCTCATGGGATTTCCAACTGATGGGACATA  
TTTCAAGGTGCTAATAGTGAAGTAGAAGTAATGGATGGCATAGAAGCTGACACATGAGCA  
ATGGCTGAAGATAAAAGGCAGAGCCAAGTTAATATGAGACTTCCATACCCATTCCAGGAG  
TATGCAGTTAACATATAGATAATATGCAGCCAATCACAAGTAATTGGTAAAAAACAAAAC  
CCACAATAGTTTAATATTACTCTTAATTCTACATGGACTTGCATAACAGCATTATCTACA  
AGGCCACAATGACCATATGAATTGTGTTATTATTCACTTCACTTGATTGCTTCCAAAATA  
GATTTATGATGAAACATATAAGTATTTAACTATCCTTTTAATAAATCACAAAATATTGT  
AAGTACCCTTCATATATCAGGTGTTTATTAGTAGCAATAGTAATTTGTGAAATACCAAGG  
TATAAAATCTGTGAGACAATCTTTTTTTTTTTGCTCGTAATTTATTTTCTATCCACA  
TTACATCCCAATTGCTGTGCCCTCCCTACTCTGTTCCCTGTCCCACCTTACAAATCCC  
TTCCACAATTACTCCCTCCCTTCTCAGAAAAGAGGAAGCCCCCTTGGCAACCCTGGGA  
TATCTAGTCCAAGCAAGACCAAGCACTTCTCTCCATTGACAAATTCATATAAGCCAGT  
AAGAAAGTGATGAGATAAGATATATACAGATAGTGGTAATTACCCAGAGGGAATGAGTCA  
CACCAACAAAGAGTGCAGGTGTGGAGATTTCCGCACCCCATGAAACAATGGTCCCAACAA  
AGGTGGAGAGGTAAGTATGTTTAAAACCTTCTCAAATACTTTCTCTGAAGTGTACCTCT  
CCTCCTGTGTAACCTCTGCTTTAAGACTACTCCCTTCCAAACAGCAAGCCTCCAAGTACT  
TTGCTGTAGAAATCTAGGCACTGTGGTTCAATGAACCATCTCTTTCTGACATTCTTTTC  
AAATTTCTCTACAGTATGAATATTCTTTGCCTGTGCATCCCCACCTCTCCCATCACAGC

CATCCTTGCAGCCTCACCAGCCAGGACTGAAACCCTTCCTCCAGCCCACTGCTGCAACCG  
GTGTCCAGGTCACACCCCAGAAGCCAGGGCCTCAGCCTCCAATGCACCCTGGACAGCTGC  
CCTTGCAGGAAGGAGAGCTGATAGCACCAGATGAGCCGCAGGTGGCACCATCCGAAAACC  
CACCAACACCTGAGGTAATTCTTTGGAGCCACCTAAGTTACTTCTTTAAAATCAGATCA  
GGATCACCCACTAACACAATGAAACAAAAACCAACTGGTAGGGCATACTTAAATAATCAC  
ATCTCTCAGACCTAACATGCTAAAAAATGAACACTTTATTAATATTCTTTTCATGAGACA  
TAAATATCTATTTCAATCTTTTGCCATCAGAGATGTCAGGTTGCAAAAGATCTGCATCTC  
TAACCTTGGCTTAATGAGACCATTCTTAGGAATAGGACACCTCAGAGAAGTCCAGGCTC  
ATCAGCTGGGGGTTTTTCAGTGTTGGAAAAAGTATAGTACAGTGATTGTGTCTCTGCAGA  
TAAAATACAGCTATGCAAAATTACCTTGTAATATTGTAAGGAAGAGAACAAATGGACAGAA  
AAGGGAAGGTGCTATGTAACCTCAATACTATGTAGCATGCATTTAATATTCTTCATAT  
CATCCTGACTACACCCTATAAAGAAAACATTAGGAACCTTTTAAGCCCAAGAAGGTGCC  
AGGCTTGGGACACACCTTTAATCCCAGGACTTGATCACAGGCAAAGAAAAGAGGATCTTT  
GAGGTCAAAGTGAGCCTGATCCACAGATCGAATTCAGGATATCCAGAACTACACAGAGA  
AACCTGACTTAAAAAAAATCAATAAATAAATAAACCTAAGCTTTGAGAGGCTACAAAG  
TTTTCCAAGGATTACACTAGTGGCCGAGTAAAAATTGAAACCACTCAAGTATGTCCAAT  
TCCAAACCTCATTACCATTCCCTCTATAATGTAGAACAAACCCAAGATAGACATTCTCAT  
CTCCCTGTCATTCACTGGAGCCATGTCAATATAAGACAACCTTTAAAAGAATAGGTTATCC  
CAAGACTTAGAGAATAAGACAGAGAGACATCTAAACTGCTCTATTATAATCACAACTA  
GAGGTGTACTCAGTTTTGTCTGTTTTGAGTGACAGTTTTAATATTTCTCATGACACAGGT  
ACCAATAATGGATTTTTGCTGATCCACAATTTCCAACCGTAAGTACAGATTTCAATAAGGT  
TCTATCCTGGAGAAAATATATATATGTGTGTGTCTATATTTCAAAGATTTTGAATGAATT  
TTCTTCTTTTCTTATTTACCTATAGGTATAGAGTATTTCTGAGTTTCTTTTTCTAAATAT  
TAAGTGCTAAGTTTTCACACTAATCAATCAAAAAAATGTGTTCCCTGGAACCTCTTAAAGT  
CCTTCAGTATGTGCATATCATGTGTGTTCTTTTGTGATTGGGTTACGGAAGTCCACATTC  
TGTCAAAAGCATCAGGATGATATCCTCCAGATGCATCTATTTGCCTAAGAATTTTCATGAA  
TTCATTGTTTTTAATTGCCAGAGCTGTGTCTCTAGTTGCATATGTAGCAGAGGATGGCCT  
GTCAGCCATCAATGGGAGGAGAGGCCCTTGGTATTGCAAAGATCATATGCCCCAGTACAG  
GGGAATACTAGGGCCAGGAAGCGGGAGTGGGGGGTGGGGAGCAGGGTGGGGGGAGGGTA  
TAGGGGGCTTTGGGGATAGCATTGAAATGTAATGAAGAAAGTATTTAATAATAAAACA  
GTCTGTCAAGTGGAGTTTTGCCTGTTTTGACTGCCTTTTCTGCTTTCCACCTCTTAAAGGT  
GTTCCAGATCGCCCCTCAATATCTCGGGGACCAATGGCACACAACAAAGCATCCGCTGT  
AAGTGTCTGCTTTCTACTTCCACATCTGTGTTTGAACACTTAAAAGGTTGATCTTGGG  
GAGATTCATTTTTTATAACTATTTTGTCTGCTCAGTTTTACCCAGGAATGTTTTACAT  
GTCTTATGGAGCAAACCAATTGGTAAGTCCACATTCTGTCAAAGCAGCAGTAAAAATC  
AATAGCATCTTGAGGGCTAAAACTGTAGAATCCATACCTAACACAAGATATTCCAAATA  
TATAATCCACAATACTACAGTCATGATTTACATAGTAAAGTGGCACACTTTCTATTT  
GCATAATCCAAACAGACACAACACAATCACATTAAGAAAAGGTTAATTTTTAAATCTG  
TTAAATTGGCTCTATTTACTCAATAATAGTCAACTCTGTACTCTGCTCTGGACACAGAGC  
TATTGAGTCCTAAGAGGATACTGAGTGGCTTTTGATATTGTCTTGAGTAGATGGCTTGAG  
TTCATACAGTGACGCACTGTTTCTTTTGAACAGAATGCTCCTGCCAGAATTGGCTTCATG  
AGTTCAGAAGAAATGCCTGTGAGTACCACCTTCTAACACTTCTTAAAACAATGGCCAGGG  
AGAACAGCTGCTGTCTACCGGAGGCAATGACTGTAAAAGAACCTAAAGGATTATTAGACT  
TCAATTCCTCTATTCTAAAACCTGACAGCTCAATTCTGAAGCAGTATCAAAGATTTAAAA  
CACTTCAGAGCTGAGAATGGTGGTGATGCACAGAATCGCAGCCCTCAGGATGTGGAGGCA  
AGAAGATCAAGAAGAGTTAAGGCCAGCCTTGACTTCATAAGACCCTGACTCAAAAATAA  
TTGCTTTTTTCATCACATTTTCTAATCATTTGTTCTGAGTGGTGGCTATTTTTGAGCCCA  
GGATTTTTGTTCCACTCCTCGTATATGAACAGAAGAGTACCCTTCCAAGAGGAGTCAGT  
AGAGTGAACCACAAATCCTTCAAAGTAAAAAGATGTGTGGTTCATACAGATATCTCTTG  
CCTTTTAGGACTATTTAGCTCCCCCCCCCTGCCCTCATGTACCTATAGGATTCTAGA  
ACTTAATGTATTTCTTTTGTGCCATGACCATGGGAGGCATAATCTAGGACTATTTATAC  
TTGAGCAAAGCTGTGTGATTTTGTCTTTTACTTATTTTATTTTTTTTTTGGGGGGG  
GGGAAAGGTTTTATTTTGTATGCTTCCAGATCACTGTTTATCAATGAAGGAAAGGAAA  
GGAAAGGAAAGGAAAGGAAAGGAAAGGAAAGGAAAGGAAAGGAAAGGAAAGGAAAGGAA

AAAGGAAAGAAAAAGGAAAGGAAAAAGGAAAGGAAAAAGGAAAGGAAAAAGGAAAGGGAA  
AGGGAAAGGAAAGGGAAGGGAAGGGAAGGGAAGGGAAGGGAAGGGAAGGGAAGGGAAGGGAAGG  
GAAGGAAGAAGAGAAGGGGAAAGGAAAATGAGGAAGAGGAGACAGGGGGACATAAAAGA  
TAGATGGAGGGAAAGAGTTAAACTCATACATAGAGCTATATTTGAGGGATACTGAAAAC  
ATGTCCCAGACATTCTCCTCAACCAAGGCATAACGAAGCTTGTGTTTTGTTTCATGAT  
GATAGAGCCCTTTTCAACTGCTTACTGTTTTCTTTTTTTTTTTTTAATTTTTTATTAGGT  
ATTTTCCTCATTTACATTTCCAATGCTATCCCAAAGTCCCCATAACCCACCCTCCCACC  
CCCCTACCCACCCTCCCCTTTTTGGCCCTGGCGTTCCCCTGTACTGGGGCATATAAAG  
TTTGCAAGTCCAATGGGCCTCTCTTTCCAGTGATGGCCGACTAGGCCATCTTTTGATACA  
TATGCAGCTAGAGTCAAGAGCTCCGGGGTACTGGTTAGTTCATAATGTTGTTCCACCTAT  
CAGGTTACAGATCCCTTTAGCTCCTTGGGTAATTTCTCTAGCTCCTCCATTGGGGGCCCT  
GTGATCCATCCAATAGCTGACTGTGAACATCCACTTCTGTGGCAGAGTAGTAGTAGAGAC  
CTGCCTTTCCTGAAAGAGGCTTCTCCTGCCAGATAAGTGGAGAATCCTCTCCCCTATA  
CTTCAAAGCCAGTTCTATAAGAAGTGTGTTTCGACAAAGCAGTCAGCCAACCTCGCTGTTG  
TGTTAGTATTTATAGCTTCTCAATGAATATAATCATGTACAATTGTATGGAATGAATAAC  
ACACAGTAATTGTGTCACTGATGGACGTTTGTTCAGGGAGAAAGAGGAAGTCCCATG  
GCCTATGGAACCTGTTCCTCAAGATTTGGAGGCTTCAGGCAAACCCTTAGGAGACTGAAT  
CAGAATTCACCAAGGGAGGAGACTTTACTGTGGAAGTAGATTCCCAGTATCTGTTACC  
AAAGGCCCTGAAAAAGGAGAAGGTCCAGAAGGCTCTCCACTGCAAGAGGCCAACCCAGGC  
AAACGGGAAAACCCGCTCTCCTTTCACAAATGGCACCTGGGGCCCATGCAGGACTTCTT  
GCTTTCCTCAATGACCACATCCCAGTATGGCAAGGGGTCTGCAGGGCAAAGACTCCTT  
GGAGTCACCCCTGCAGCTGCAGACCCACTGATCACCCCTGAATTAGCAGAAGTTTATGAA  
ACCTATGGTGCTGATGTTACCACACCCCTGGGTGATGGAGAAGCAACCATGGATATCACC  
ATGTCCCAGACACTCAGCAGCCACTGCTACCTGGAAACAAAGTGCACCAGCCCCAGGTG  
CACACGCATGGCGTTTCCAAGAGCCCTGATAACCTTGACATAGCAGCTACTTTGTGTAT  
GCACAAGCTTTCAGCTTTGTCCCATAGTACCTTGTGCTAAAACACTTACTATCCTTC  
CGCAGTGAAGGTGTTAAGAGCACTAAGCATATATTAATAAATACAAGTGGCTAGAAATAG  
TGTAGGTCCTTCTTGCTTCCATTCTTATCAAATAAAATGTATCAACTGTCTCCGTGAC  
TTAGAAATACTATCAATGATATCAGAGCAAGTCTAAGTGTGAGCACTTGGTGGTATAGCA  
TGTAGCTGTCTTAGGCATTATAAAATTTCTTACTACATGACATTATTATGCCAGGAA  
ATGTGACACTGCTTCTTCTCTACACAAAAGCACTTAGTTTCAGAATTCCAAAGTATTTT  
ATTTAAACCTTATTAATGTTGATTGGTGAAAACCCCTGACTGCTATTACTGTTTTATA  
TATTGGATTTAAATTTCTATTTATAGAATATTTTATTTAATCTAGGAAAAGAAAGGGCA  
ATTGGCCTGTTTTAAATAAAGAATTTTTCTCACTGAAAATGTCAGGAATTGTATGCTTAT  
TATTTATATGATTTAAATAGTAAAGAAAAGCATACTCATCCCTTGTTCGCACTCATT  
ACTTATTTATTTTATCCAAAGTTCTCTGAAGATTTACATAAGTCTAAGCACTATGCAAG  
GTATAAGTTTTATGGTCTCGTCTTCAAAAATTAATGGACACAATAATAGGTATCAC  
AGTAGTAACAAAACAGATGGTCTAAAGCAAGCTCAGTTACTGTACATACATTATCTCACA  
CTACTGCAAAGATAAAAAGTGCCTCAAGCCTACTATAACATTACCAAAGTTCTATGACAA  
GATCGGGTCTGGTACCACGGAGAAGATGCTTCTGAGGGCCAGCCGATGGCTCAGCAAG  
CAAAGACACATATCACCAGGCCTGATAACATGAGTTTGATCCCCAGGGACTCACATAGTG  
GAAAAAAGAAGTACTCCCGAAAGCATCCTCTGACAGCCACATGTGTGTCATGGCACAT  
GTACACACATGCACACAAAATAAATGTTAGTTTTTAAATTAGAGAGAGTAAGGCTTTTTG  
TCCAACCTAAGTACATTAGAGGAGCAATGAAGGACCAGACATGTTTTCTTAGTAACATA  
AAGGTTTGCAGAATGAGGCCTCCAAGAGTAAGAACTCAAGAGTCATTTGTATAGCAGCA  
ACACAGGAAGTGGGATGTAGGAAACCACACATGCTTACTACCAGGGACTAGCTGTGTGCA  
CATCAGAGCAGTCTGCCTAAAATAAGAGATTGTGAGCCAGTTTTAGATAACATTGAAAA  
TGAGCCTCCTGCTCCTCTCTTCCACTTTTACTAAGTTTTCTAACCAGGTTTTGAACTC  
TATAAAATTAATTCTACCCTATCCCCTGATCAGAATATGATCAAAGAAAAAGAGCCTG  
AGATGTTTCCAACCTAGAACCTTCAGGAATGGTAGGGAGCATGTTGCAACAATTTCT  
GCCACTTCTCTCAGGCAGGGCTCTGTCTCCCAAGCTTCATATACTGGGGGGGAAGA  
TGCATAAGATAAAAATTAAGTTTACCTTCTCAGTACTGGTAAAGGTACAAGGATGGAGA  
ATGATTCATGGGACTAGCAGACACTTGTGAGACTTACCCTGCAGACAATGCCTCTA  
AAAGAAGCAGGAAAAGACATGTAATTGCATTTGGATTCTATTCTTGACATCATATCTTAA

AATTTGTAAAACACTGGATATGAAATATAATCTCTTGATTCCTGTAACAGTGCTGCTCCA  
CCCCAGGCTTAATGTTGGGATCGAGCTAAACACACAGATAAATTGCTGAGTCACACATCC  
TTTTCGTCTTCCCCAACTGACCCATATGATAGAAAGAAGTCAGCACAACAGCAGAATGTA  
GCATCTGGAGGATAGAATTGTTCTCGTTATCTGATGCCATTTTGCTTTTCCATCCACACT  
GAACACATAGTCCCCTGCTCCTTCCTTGTAATTCATAGCACTTGGGAGACCACATGTA  
GTAACATCAGATCATGGGTTCAAAGTTGGCTTCTGCTATTAGTATGCTGGGTA  
AGTGGTAATATCTAAATCAATTTTTGTGAGAAAAATATGTTGTTGGGTCCTTGAATGTCC  
TTTATCACTTCCACGTGGTCATTTCCAACACTGACTTGGTACAAACAAGATACCCATGGA  
AAGAGGCCAAATATCACTTGAAGGACGGCCATATTA  
ACTATTGAGTTTCTTTATCGTGTT  
TTTTCTACTAGGCATTTATGTGAGAAAAAGATGACTTCAA  
ACTATATCCCACCCTGAC  
AAGTTTACCTACCAACCTTTCTTCTAGACTCACCTCACC  
ACTAATCTTTTGATTTTATTC  
TTTTCAAATTCCTGTCCAGGAGACAAATCTGGAATTT  
CCTGGATAAATATAATCCTGACT  
CTCAGATCATCTCCCTTGCCACACAAAATAGACGATCAG  
ACACATCATTAAATGACTAC  
AGTTCCTGACA  
ACTTCCAGCAGACACCAAAACACGACACAGAAATCCAT  
GAACACACTGT  
CCTCTACATAAGCTGCTCACAGGCAGAGCAGCCACACAT  
CTGATTCCTCTGAGGTGGGAT  
ACATTTACAGTGATCACTGATGATTACATGAGACAGCAG  
GGGTAACTAGCACTGCCTA  
AAGCGAACCTGGACATATGGCATGGCACTCCTTATGAT  
GACAGACCTATAAGTGGATGGA  
AAGCTCTCAA  
ACTTAAAAAATAAAAAA  
AAAAAAGTGCGGGGAGCAAGAATGTGGAAAC  
CTGAGTCTGTTGCTTCTGCAATTTGTGTCCTCTAGAC  
CTGCTGCCATATTCTATTTCA  
CTGTTGTTGTATCCTGCTTTACAGTTCAATGGGTACATA  
CACAACATAG

Ambn\_FIMO

| motif_id                                                                                                                                                                                          | motif_alt_id      | sequence_name | start | stop  | strand | score   | p-value  | q-value | matched_sequence  |
|---------------------------------------------------------------------------------------------------------------------------------------------------------------------------------------------------|-------------------|---------------|-------|-------|--------|---------|----------|---------|-------------------|
| 2                                                                                                                                                                                                 | HTTCTRGAAVNTTCKYM | 5             | 2622  | 2638  | -      | 14.3697 | 1.83E-06 | 0.0606  | TTTCTGGAATATTCTAA |
| 2                                                                                                                                                                                                 | HTTCTRGAAVNTTCKYM | 5             | 7815  | 7831  | -      | 13.5515 | 3.74E-06 | 0.0619  | ATTCTAGAAATTTCTGT |
| 2                                                                                                                                                                                                 | HTTCTRGAAVNTTCKYM | 5             | 7235  | 7251  | +      | 13.1455 | 5.65E-06 | 0.0623  | TTTCTAGAATTTACTTA |
| 2                                                                                                                                                                                                 | HTTCTRGAAVNTTCKYM | 5             | 5695  | 5711  | +      | 12.1576 | 2E-05    | 0.166   | CTTAGAGAAGTTTCTCA |
| 1                                                                                                                                                                                                 | DGAANDDDCN        | 5             | 11530 | 11539 | -      | 9.69697 | 2.65E-05 | 0.496   | TGAACGGGCG        |
| 2                                                                                                                                                                                                 | HTTCTRGAAVNTTCKYM | 5             | 2362  | 2378  | -      | 8.84848 | 3.66E-05 | 0.243   | ATTCTGGAAAGATCAGA |
| 1                                                                                                                                                                                                 | DGAANDDDCN        | 5             | 6769  | 6778  | +      | 9.44242 | 7.72E-05 | 0.496   | AGAACGGGCT        |
| 1                                                                                                                                                                                                 | DGAANDDDCN        | 5             | 10264 | 10273 | +      | 9.44242 | 7.72E-05 | 0.496   | GGAAGGTGCT        |
| 1                                                                                                                                                                                                 | DGAANDDDCN        | 5             | 15900 | 15909 | -      | 9.44242 | 7.72E-05 | 0.496   | GGAAGTGGCA        |
| 1                                                                                                                                                                                                 | DGAANDDDCN        | 5             | 16396 | 16405 | -      | 9.44242 | 7.72E-05 | 0.496   | GGAAGGAGCA        |
| 2                                                                                                                                                                                                 | HTTCTRGAAVNTTCKYM | 5             | 1432  | 1448  | +      | 7.90303 | 8.13E-05 | 0.449   | TTTCCAGAAGAGTCTAC |
| # FIMO (Find Individual Motif Occurrences): Version 5.5.6 compiled on Aug 4 2024 at 17:26:56                                                                                                      |                   |               |       |       |        |         |          |         |                   |
| # The format of this file is described at <a href="https://meme-suite.org/meme/doc/fimo-output-format.html#tsv_results">https://meme-suite.org/meme/doc/fimo-output-format.html#tsv_results</a> . |                   |               |       |       |        |         |          |         |                   |
| # fimo --oc . --verbosity 1 --bgfile --nrdb-- --thresh 1.0E-4 motifs.meme Ambn.txt                                                                                                                |                   |               |       |       |        |         |          |         |                   |

>X dna:chromosome chromosome:GRCm39:X:167957484:167971609:1  
GACTGGCCTTGCATAAGTTTACAGTTTATCCACTGGAATCGAGAAAGATGGGGCCTATG  
CATAACTCAAGATACTCCTGAAAATGAAATTAACATCCTTTCTACTTGTCTCCATGTACC  
ATGTATCAGGAGAGCATTTCATCCTTGTGCATCAGCCCTCTCATCAATGGGAACTTTAATT  
CTCAGCAGAGATCTTTCACAAGATGTGTTGTGAATACTTCTATATCAAACAAATACCATG  
GTTTCCCCATTCAATGATAAGCTTGGGGTCCACATAGAAAAATAATCAGAAATTGATCAC  
TATGTACACATGATGAATTTATACCATAACCCTAGGGTGGGAATCGAAAGTGAGGTTGGC  
ATTGGGGGTAGACAAAACAGCATCTGGAAGATCAGATGTGGTGGAGATCATGAAAGGTCA  
CAGTGAGTAAGGAAAATGTATAAATATAAATATATTCATATAAATGTGCACACATTTGCA  
CATGCACATACACATGCTACATATACAGACACATTTCATGCACATACACACACACACAC  
ACACACACACACACACCCCCTACATTAATTGCATCCAGCAGGGATTGAATTTAGTGGAC  
ATTATGGCTGTTAGCTTTCTGTTTTATGAGACTTCTCTAATAGTGAGATGCAGTGCCT  
GCTGACTCTTTTGCCTGCTCTTAGGATTCTTTTCTCTACTCGGTTGCCTTGTCTAGCCT  
CAATATGAGGGATTTACCTTGTCTCGTTGCATTTTATTTAGTTATGTTTAGTTGTTGTT  
TCTTGAAGGCCTGCTCCTTTCTAAAGGGAAACAGAAGGGAAAGGAGATCTGGAGGAGAGGG  
GAGGTTGCATGAGCTAGGAGAAGTGGAGTGAGGGGAAACTGTGCTCAGGATGTATTGTAT  
GAGGGAAGATTCTATCCCCCTCCACCAAAAAAAAAAAGACTGAAAGAAAGATATGAGCACA  
TTTGATAGGTGAAGAAATTGAGACACAGGGACAAGAGATTTATCCAACTTTCCACAGCTA  
TGGTACATAATTATGACTCAGAAGCTCTGCTTGTAAAGTCACTCCACTGGAAACCATCATT  
GAATTTGGGTGGACACTTGAATAGCCCCAGCGTACTCACATTCCACACCCAAATACAGGA  
TAATGGATTAGGATTGTGGATGTTTTATGGTGTGAAGTAATTTGATATTGTTTGAGGTA  
TTTTTAACATAAGAAAAAGATACATATTTAAACCCACAGTGGTTTTCTCCCTCTCT  
TCATTCCCTCTTTCCTTTCCTTTCCATTAAAGGACAGGGACATTGGTAGGAGTGCTGA  
GTAAGTGGTTTTGGTTTTGTAAACAAGGAGGTGGATATTATTTAGCTTTTACCCTTCTC  
TCCTATAAGCCTCAATTGTTATTTATCTTTTGTAAAGTGCAGGTGTTTTACACGAATCTC  
ATGTGGACTCTTTCACAGGAAGCTTTTTGAATAACTAATTTAGCCAATAACCCTTATTGA  
TAAGGTTACAGTTTGTTTTTTTTTGTTGTTGTTGTTTTGTTTTGTTTTGTTTTGAAACAG  
AGATTGGTTAGAACTAAATCTCCCCAAAAGAAATCCTCCAAGTAATAAGAAATCCACAA  
CGAATGTAAGCCGATGAGAATTTTATTAAGGCAATATTGAACACTACTACATGCCATTAT  
GTTCTGGGAAGGTAGGAGAGTGGTTGGAATCATTCTTCTGTTGTGCTTTCCATGTTAAGC  
TGTTAAGATAAGTAGAACATCATACTTTTATAATCAACACAATTATTTAGTATTTC  
CATACCTTTTAAAGTTTTGTATTTGCATTCAAACCTTGGTGTTCCTGCTATTGTGTCCTA  
CCAAGGGGCAGACATCAGGTTTATGGTGAAGTCTATAGATACATTTTGTATGGAGTTAC  
AAAAGTAGATATAAACATGTTTCATGGGAAAAATGAGCAACTTGATTTATTTCCCAAAA  
TTTTATTAACCTGTAATATGTCTTGTAGTAATAGATAATGTCATCCCTATATATTCTCT  
AAGTGGTTGGAATGAGGAAAAGACATTTAAAATTTCAAGTTGCTCAAATATTACCTGTCT  
CCACACATGTGCTTTTTTTATAGGTAACCCAATGGACATGTGTATGTGCAAACATGTGT  
GTGCCCTAATAATGCTGTAATTTTTGAACAATGAAACAAAAGCGAATGCAAAAATTTCTA  
GCAGTTACAGCCAATAAATCTATGTCAGAATTGAGTAAAAAAAATGTGGTGGTTTCAGGT  
TTTTTTAATCAGCTTAACTTAACTCTTGCCAGTAAAGCTGCAGGTCAAGGTCAGACCT  
AACATACCTCCAGTCCAGATGTGGCTGGTTCAAAGTCTGAAACACCATTTCATTTGGTGCT  
AAACAATTCTATTACAAACAGGGAAATGAATTTATTTCAATTCCAGATTTGCCTGTTTTG  
GAAGGGAAGTGTAGGAGAAACCATCATAGTGTATATGGTTTGACAAAAGAAAGCAAAAGA  
ATACTCTAGTTCTTAGGAAAATCCTCTTTCATGACAATGATTACTGACATGCTTAGGAAA  
TAACATCTTATGGGAACTAAAAGTTTACATTTAACCAATCTGTTAATCTGTTTTGTG  
TCATCTTTGGTTTTCAAATCTTGGAAATTAATAAATATGCTTTGTCTGACTCAGAAAGTAGT  
GTATAGAGAAACAGTGATAAACTCTCAGTACTATTAGCAGTGTGTCCAATGTGGCAGT  
TATTTGCCTAGTGTGGGTCCTGAGCATTTAGAATATATCAACTATAGTAAAAAATCTAAG  
TTATACATTTTATTCTTTTTAGTTTATTAAAGATATAAATGCCAACACATGACTAATGTG  
TTGGACATCACTGGTATAAAACCTAATTACCACTTAATATATAGCTCTGGTTTTAAACATT  
CTATTGCCTTTTGTATCTATGTATCTACATTTTGTAGTATAGTAGTATGGCAACCACTTTG  
ATAAATGATAGTTACTTCCAGAATTTTTAAAATATCCATCCTCAATTTCTGCTAAAAAG  
ATGAATATTTATAGAAATATCAGTTGAAATTAGATTATTAGGTTATATCTTCCATTTTAT  
TTTCTAATATAAGAGCTATGCACAATTCTATCAATTAGAATCATTTATAGAAGTTGAACT



CTTCAGTATGGTACAAACCCAATATTATGAAGCATACAAAAAAGTACATAGAAGCCCAA  
AGTAAAGGTTGGAAGGTTAATGTGAGCAATATTTTAGGCATTTATTGAAGTTGGATGTTT  
ATTAATATCAAAGTTATTGTAACCCCTCAAGTTTTGCAGGTTTACCACATAGATATTAT  
AATATGCCTGTGAATTCTATGGCCTTTGAAACCATTTACCTCCAACAGAATATAAGTAG  
TGTTAGTCTTAAGTGTATACATTGGAATAAACATATTTGAATTAATACGGATATTTGAAA  
TGCATGCTTGTAACTTAAAGTAATAAAAAGCAAATTGTCTACATACCGGATGCCTTGTC  
ATGCCCTGGTACCCTTCATAGGAGAAAAACGCCTTAAGAGAAAGAGACATTAGAATGCAG  
TTGATTTAGTTTTGTTTCATATGAACTGAATGCTAAACTCACTAATGCAGTATGAAATAT  
AGACTCACTAATGCAGTCTGTGAGTATTGATAGCCTGAGAATGTGACTTCTACAAAAGA  
GAGCAGCTAAACACAAGTCCAAGGCTCCTATGTCAAGTATTGTGCTACTAATATTGCAGC  
ACATTCCATAAGTTGTCCATGATCTGAGGCAAGCACAAATACCCTCATCTTTTAGAAA  
GTCATGAAGAGTTAGAGTCACATTATGCAACAGGGCTATAAAAATGGGAATCTTTTTAT  
GCTCCACAGTTCATGCTTCTCATTGAAATCGGAAAGCATGGAGCTCTAAGTGGTCACAGG  
GATGGGGAATTTCAGGACACAATGATTCCACCAAGATCCCCACGAGTTTGTATTTTTCTA  
CTTCCAGCTTTTGATCACAAGACAGCAGACACAGCTTCATGAATCACAATTCAAACAAAT  
GATCAAAAAGAACATCAGTTTTTTTTTTCTCTAGGGTATATCCATACATCCTTTAAGAAAA  
GGGAAGACTAATCCCTAAGATTTTTTTTTCCCCAGGAACTTGTCTTTGCCCTCATTCT  
ATATTCATGGTCGACCACAACCTATCCGTCAACTAATAACAGAAAAGAAGTATGGAACT  
GATGTCATAGTTAGTGTGGAAGAATGGACCTCCACTCCCTGGGTAGTGGAGAGGGCACAT  
CTCAATCCAAGTAGGTGAAAGGCCACATGCTGGGATCAGTTCAGCTCTACCAGTGAGG  
AATAAGTTGTGAGCAAGCTGATGAACAGCTATTAATAGTGACTGCTATGTGCCATAGAAT  
TTTGACTTTACTTATGCCATAGGATTAATGCCATTTGAACATCCTTTCTTTTGATGGCT  
AGGTTATTGTATCCCTTTGGTGGATTCTAGAACCCTAAGGATAAGGAATTACTGTTTTCA  
CTATCACATACAGTAATACCCAGTCTAGTGAGTGCTTGAGAAATATTTACTCAGTTGATT  
AGAAGTGGCCTATGCTAATTCATTAATGCTTTATTTTTACCTTTATTACTGCATTTTAG  
TTCTTTAAAATCAACTAATTTGTTTGCATATTGATATCTTCTCAGAGAAAGCTATGTTTA  
TTCATTCCAGAAAATGATTAAGAGAGACCTTAATCATGAAGGTAAGTGAATAAAGTTACT  
GTGGGTGCTGTGTAACATAAATCCTGCAAAGACTGTTTACAATTTTGTGTGGGTGTAAGA  
GGAAAAATGATTCAAATATAAATATGAGTGGGAAAGAAAACCTGTTTTGAGTCCATTTTA  
CGCATCTGTTAGCGTTTTGAAGACCATGTGGTAGACTTAATCAGCTTAAAGATTATGAGG  
TGAAAGAAATGACTTGTGTATAAATCACTGCAATTCCTGTGTTGAGGCTCCGTTATTAA  
TTTTCTTAGGAAAAATAATTATTTTAATAATTTAAATTTTCAAGTGAATTACCATATATATC  
ACATAATTTCACTCAAAATATTTTTCTATAGAATGAGATCAAAGACCAGATTTTGGTTA  
CTGATGTGGTGTGAAGAATAAAGCTAAAGTTCCAAGTCTTAATTTGATTTAGAATATAAA  
CATTCTTAAAGTTTATCTTTTTCAATGTAAAGAATATTTCTTCTAAACTTGCCTTCATT  
TGGTTCAGTTCAGTGACTATCCATGCTTAACTATTTCTGTTAACTTTCTCAGCTATTGT  
TTATGATGTACAAATTTCTATTTAAGAAAACATTACAGATAATATAAAAGTTCTCTAAG  
AAGATATAGTCATGATTTGCCTGCTAAATGGTCAATTTGTAGGAGCAAATGACCAGTCCC  
TATATTATCACTTATAAGTTCTTCTCTCAAGTATAGGAAAATTTAAATTTAATTCAAC  
ACAAAGACATGAATGATTTTTCAAACATTTTATTATCTGCTAATGATACTTATTTTTAGT  
TACAGAATTTACTAAGTGATTGTAGGCACAAATCATTGTGTTCTTGAGTTATTCCTAAAA  
ACAACCAAAGTATCCACTTCGGTTCTCTCATTCTTCTGAATTTTTTAATCCTGAAAAATA  
TAGCAAAAGGAACAATTAACATAATTTACAAACATTCCTAGTGAATACCATTTACAATAA  
TAAGTTATGGCTTCAGTTTTTTCAAACAATGTATAACCATTAACCTTGATTTTGAATTT  
CTGAAGTTTCTGTCTTGTCAATTAATAGAAGCTCTCTCTGTTGAAATCACTAAGGCATA  
TTAATAATATATTAGTAGCTGCCACCTTGATCAATTGTTGCCTGCTATAATGTCATTAC  
TTTATTTTATTTCCATAGGGCAACTCTAGGCAATCATCAATAATTTTACTCTAATTTTA  
AACAGGAGGATACTGAGTTTAAAATGATCAAACCTACCTACCAAATTCATTTTCCACAA  
ATATGTTTGGCAAGATAAAACCCATGATCAAATCTACAGTGTTAATCGTTAGTAAAGACA  
CAAATAAACCCACTTTGCATGCAAACATAGAGCATGTACCTTAGTCTAGGATAATCTGTA  
CTAGCTACCAAGTCATTCAATTCTAGTCAATTCTCAAAGCTTTGCCTCATTTCATAAA  
CAGGCTTACAATTGTGAAGACATTCATGACAGTGTATAAGGAAATGCTGGCATTAAATTCT  
AAGTTTTAGAAGTTATCTGTTTTTCCCCTTTTCTTACCTTAAAGAGGGAAAACACCCTC  
AAGATGGAAGTAACATGGCACCTTACCATCTTTTTTTTTTTTTTTTTTTTTTTTTTTTGGAG

GGAAAAGCTAGGGCTAGAACCTAGATGCCCTGGTTCTAAGGACAAGCTAGGGCATGCCTC  
CCTCACTCCTTTCTGATTCTGAGTAGCAAATCACTAATAGCACCTAAAAATGGAATCAT  
ATTTGGGTGCAAGTGCATAGTATAATCAAATTATTTCTTATATGTTACTTGTGTGTGTG  
GTGAGTGAGTGTGTGTGCATAAGGATAATTTTATTAATACTTTTCCCTTGGTCAATAAG  
AGCTTTCTGTAACATAGGAGTATTTAATGCTAAATTCTGAGAACTCTTGTCAAATGCTT  
AGTCTATGGAATCCTAGTAATGAAAAGGAACCTAACAGCATTGCCTATAGCCACTTTCAA  
ATTGAATGATCACTTTAGACAGGCAATCGCCCTTTATGTCTTGAAAGATAGTTTCCATCT  
ACCTCTTTAGCTTTGTTGAAATATCTGTCCTCCTTACTCTCAAACTACTCCTTTTATAT  
TCTTCTGCAGTTTTAGCAACTACTCAAGCCTTTGATGTGTATGTGTGTGTGTGTGTG  
TGTGTGTGTGTGTGTGTGTGTGTGTGTGTGTGTGTGTGTGTGTGTGTGTGTGTGTG  
GTGCATTTAGTAATACATATACTGGTAAGAATTCTATAATTAGAATTTAAATATGCCAT  
AAGACCTATAGTGTTAATTATGAAGCCATGTCACCAAATTCATTTGTAAAACCAAACAG  
ATATAATGTATGCTTGGATCAAGAAAGGCAAAGATCTATGGTTTCTGCAATTCTGGGCTC  
TGATTCATTTGAACTTAGAACTCTGGGACCAATTCTGTAAAGTCACTTTCCAAGGATT  
TGTCTTTGCTGGTTTCAAGGTATACTCACCCTTCTTCCCGCTTGGTCTTGTCTGTGCG  
TGGCCAAGCTTCCAGAGGCAGCTCAGGAAGAATGGGGGACAGGGGCTGCATGGAGAACAG  
TGGAGGCAGAGGTGGCTGTGGTGCCAGGGGCTGCATGGGATGCAGAGGTGACTGGGGCTG  
CATGGGCTGATGAGACTGGGGTGAATGGCCTGGGGCTGGAAGGGCTGCTGGAAGGGCTG  
CTGGGCGGATGGAGGGATGTTGGCTGATGGTGTGGGTTGGAGTCATGGAGTGGTGGCC  
AGGAACTGGCATCATTGGTTGCTGGGGGCCACGGGCTGTTGAGCTGGCACCACGGGAAG  
GTGGTGTGAGGCTGAAGGGTGTGACTCGGGGGATGCTGTTGAGACAGCACAGGGATGAT  
TTGGTGGTGCAGCCATCCACCCATGGGTTCTAACCATAGGAAGGATACTGGTGAGAAAC  
AAAGAGTCAGTTTACCATTGGCTCAGTTGATTTCTAACTGGAGAAGTAGCAGTAGTGTT  
TGTTATTATGACCTTATGAATATTTTGTGATTTTCTTTGCAAGAATTTCTAACAGTG  
TACACAGATATGACCTTTTACAACTAAAATTCCATTAGTGTGTTGAAGGTGGAGTAGAT  
ATGATATTTAGTTAAAAGGGACTTAAAACACATGTCTATTCTTAAAGGGAAGGAAGA  
ACAAAATGTTTACATACCGGCTGCCTTATCATGCTCTGGTACCCTTCAAAGGGTAAGC  
ACCTTAAGAGAAAGAGACATTAGGATGCATTTGATTGAGTTAATTACATATGAACTAAA  
TACTAACTCACTAATGCAGTATGAAATATAGACTCACTAATGCAGTCCTGTCAGTATTG  
ATAGCCTGAGAATGTGACTTCTACAAAAGAAAGAAGGTAACATTTGTAGGATGCTT  
TCTATGTGTCAGGCACTGTGTTACATCCATCCATACACTTTTCTGCTTTCTCGCATGA  
TTGGAGGCAGGTATCACCTTCACTTTTATAGGTAATGTTATGAAAACCTCAGGTAGGTTCA  
TTCCTCAGCTGAAGTAACAAAAGCAGTAATTCAGTTTAAATCCTCTTCAATTGCAAGAGCA  
AAACAATTGAAAACCTTATAATAATGTGATATAATAATCATTACTTGTGTTATTTGATATCA  
CAATGGAAAATGAGGTAGAAACATTGTCTTTTATCCTTCCAGACATAGATTTCTTGGTCA  
AATATATCAATCAACCTTTTCCAGATAAAAACCTAAAATTTGCCTCAGATCCTTATGATAT  
TTTTCTTCTGTATATACTAGTTAACAGACTTAGGTTTTTTTTTATCTGATCCCATGAGAT  
AAGTAAAGAGTTTCACTTCTTCTGGACAGTATAGTCTTATTAATTAGTCTCAGATAGCTC  
TTTCATATAGTACATCATTTAACCAATACATCAAAAAGCTATTAACCTTACTCAAGTTAT  
GAGTGACACAGCACTTTTCAAGCTCTTCTGGATGATATTTTTTTGGAAATGTTCTTATCA  
TTGTTTCCCTTGTGTTAGGTGAGGAAGCCAAAGTTACAGAGTGGGGAAGTATTTTCCAG  
GGTCATATAGTTTGCAGGCAGTTTAGGAGAACCCCAAATCCTGTTTCTAGAACATTTCTG  
TGTTCCATCACTCTGTAGAGACTTTGGTAAACCACTTTTCAATTGATCACTTAGCATAGCC  
AATGAGAAACACACACAGTGTGTGGATGTCTTTGAATCAGCAATTTTTTTCCAGCTAGAA  
AAGATTTAACATCTTACTTACTCCTTGAATTTTATAGGCTGGCATAGAACAAAGACTGTT  
GAAGCTGAGTTCACTCTGCCCCTATCATGGAGCCTTCTGAGTGGTAGTTCATGGTGGGA  
TACATTTATACTAGGTTAAAAGTAGAGGTTGAGTCAGAGTGACCAGGTAGGAAGGTGC  
GGAGAAATGCAGTTTGGAGACATCAGTCAGGGCTTAAAGCTGCTGGTGGGAACTGAAAA  
AGTGTGACCATTTGAGAAACATCTTGAATGAAGAATCAATACACCACTCTTTACAGA  
CAGGGAATCTTTAACTCAAATAATAGTCAAAATAGTAAATAGAAAAATTACCTCATAGC  
TTAAGTTGATATAACCAGGGCTTCCAGGATGAGGTGGTAGCTTTTTTGTAAAGGAGAGAA  
GGCAAAGTAAAGAGAAAGGGAGGAGAAAGGAGAAAGAGAAAGAGAAAGAGGTTAA  
GTCAATATGCAATTGTTTATTAAGGTGTCTAAAGCTATTTTAAATATATATATATAT  
ATACACAAAGTTTGCAGAGTGTATTTGAGGTCTACTTTTGTGCTGAGCATGTATGCTGTG

AAGGAGGAACCCCATGGTCCAGAGTCTTCTAGGGAGATCTAGATGCAGAAAGCATCATAC  
ATTTACCTCCAGAGATCACTGGGTTAAACCCATCAACTATCAAAGGACCCCTCCCTGTT  
GTGCCACCCATTTACTTGTGGATCAAACCCGTGTTAAAAAAGAGGTCTGTTTCTG  
TGGCACAATTTAAATGAACAATAAGCCAGGAATTGTTTCACAGACGGTTGTTTTATAGA  
TCAGCTGGTTAAATGTTCAAGAATCAAAGGGATTCCAGTAATTAACATGCAAAGTAAGT  
AAATAATACTACTACTCCATTGTTCAATGTGAGAACAAGACGAGACTAATAAAATATAAA  
TATTCTAAATCCATCCCTGGACAATAAAATAATTGATTTATTGAAGTTCAAGGCCAACCC  
CTTTTTATTATTGTCAATTATTTATGGCAGAAATTTAGAAGTTCCAAATAAAAAGCAACC  
TCAACAATTTTCTAAACCAGGACTCTCTGTGCTTCCCAAAGTAGGGGCCTGACTAGTGCC  
TGTTTTATGGAGTTTCTTATGCCCTCCCTGGTGATGGGGGCAGGAGACAGAAAGCTGTG  
AGCATAAAGCTGAAAACCTCCCTCAGTCACAAAGCTGCTTAAGGGTCACTTCAACTTTAC  
TGTTTTCAAATGCTCATGTTTTGCAAACGAATTTATTCACTCTCATCTGAATGTTAATTG  
CATCAGTTGGGTAACCTGTTTTCCCTAAACTGTATTGATATAAGTTCTCTGAGAGTTTTGT  
ATTGAGAGGGTTGAGTTTTGTAAATGCAGGAGCACCTTGGAGGACTAGGATTTTCAGGAATG  
CAGAGCACACAATCTTGGTTTTATGTGTGAGAGAAGTGTGGCTGATATACAAGCTTACAT  
GTATACAGGAGTAGAATCAACTGCTCTTTATACCATTGAAGAGTATTGCTCGCATGTGAT  
CTAAGCCTTCTGCCATTTTGTACTTTTTGTCTAGAGAATGGACCAAACCTTCTGGTCTTTT  
GTGCAAATCTGGTACTGTATTTGCATGCTGTCAATGTGTATTTGGCACAGGCAGGCAGGA  
TTACAGTATCTTGCTACTGCCAAATCCTATATAAGGAGTAACCAGATCCACCAAAGGTAG  
AGGGCTTCATTGAAGTGGCACAAGAAGAGAATTTTTAATGTATAAATATTACCCCTTAA  
GACAACAGCAGTGGCATCTGGAGGGCAAGAAGAAATTTTGAACCTTCTGAGTAATTAAGC  
CTTAGAGATTTTTTTTTGGGGGGGGGCTGTTATATTTGCCTAAAACAAGTAAACACTCTCT  
GGAAGCCTTTCAAGGGTCCCTTCAAATAGATAACTACTTGTAGAGATGGGCAGTGTTGTT  
TACAAGCTAATCGTTACAGGAAGATCTCCTAGGGGTCAAATGCTTGTTAAAATCTTGAGT  
GCTTGGTCCCCTTCACTGACTGAATCAGTCAAGTCTAAGGTGGAGACTTTCTGATTTTC  
TTTTTAACAACTCAAAAATGATTTCTTCAACACCTATTAGATACTTGGGGATATAAGAT  
CTTGCACTGTGTTACACAGTGAATAATCAACTATGGGAGCAGATTTCTAGTTCCAAGA  
TTATTCAATTGGATGCAATTAGTAAATGGATTGTTTTACTCACGGGCATAGCAAAGCTG  
CTCCCAGGAGGCAGGCAAACAAAATCCAGGTCCCCATTTCTTGATGGTTCTGAAATGTAA  
ATCAATACCAACCATTTAAAACCTTTTAAAAGCATGAATATAATTATGCTTCATACATGT  
ATATAATCCACATTAATGTCTTGCTAATCAAAAAGAAGGTGCGGCCCTTATTGTAAAGTG  
ACATTCATATGGAATTATCATTGCTTCTGGAGTACTAATATTGCAATGTGTTTATTTGTT  
TAAAACTAAGCTGAAGCTGAAGGTTAACGAGTTAGAGGACCAAAGTGATCTACAAGAA  
TGATGCTGCAAACCATTTTCTATGCTATACAGCCTAAGGATGCCTAGAAGCTAGATGGAA  
ACAATAAACTGATTAAGAATCGGGTTGAGTATAACAGTTGGAGAGATAATCAAATGA  
ACATGGTTTTATACTTTGGTAACAAGAAAAGATAGAAATGTTGTTTTCTTTTGGGGGGC  
ATAACCCACTTGAGCATTGCTACTGTTAAATACATAGAGTAATTTTGGAGAAAATATTG  
AATAATTTTACAGAATGGATTAATGGCAGAGTGGGTTTAGGTCCACTTGTAGAATTTTAG  
GCAAGAATCTCTCATAATGCCTTTAACTCCAGGTTTGAAGCAGAAGGCATGCTTAATCC  
AAAGAAAGAGAATAGTGCTACCATTCTAAGCTTCTTTAAGGGTTGTGGAATGTTTCTAC  
GTAAGAGTTCTGTCTTAAGCCAGTAGCACCTCTTCTTGCTTGTCAACTATACTGTATT  
CCTTCTACATATTAAGGCCTTTGAAACATGAAGCAAGAACTACCTATCCTAAAATATGCC  
ATTGGTTTTGGACAACACCTTGAAGTAAATTTAGGACATGAATGTAAAATGCATTGGTG  
TTACCTATGAAAAATACATTGAGGATTTCTAACATCTAAACCTTTTCCCCCAAAGGTTG  
AGGTAATAAGAAAAGGATTCACAAGATTTAACAAGATTTTGTAAAGAAGTAGCCCTCAG  
CCTGTTAAAACAGCATCTTAACTAAAAGCAAATACACATTTTTGTATCAAATCTGGCTC  
CCAAAAGGCTTTGGAATGCTTGACCTAAAATTTACAGAAGTACATACATTACTGTACTAT  
AAAGTTAAAACCTTTTTCAATGATTTAAGTCTATAATTTTATTATAGTAAAACCTAAAGA  
AGTACATATGGTGTAGATGGCACAAGAATTAGAAATGTGCAATTCATTCACACATTTGA  
AACATGAAATTCAGAGAAAGAAATGACCACAGTGGAGATGGTAAATCATGAATGAAATCC  
ACATACCTTTGAGTGTATGCTCAGTGAGTTTCTGTCTGAAGCTCAGGGATGCTTGATCCG  
ATGGTTTCTTCCAACCTCTGTGCCCAATTTATATCATGCAGGGCACTTTGAACAGCCAAT  
CAGGTTTCTGAATGAAAAATGTGTTGAGTCTAAAGAAAAATCCCTGTATCATGATTTTTT  
TAGATGCCGTGAGCACTGTCAAGACTGCATGTTGTGATTAGTGCATATAGTCGTTCATTA

CAGGCAATAATAGGTTTGGGAAGCTGTCTTCAAGTCAGCAAATTAGTTGACTGCATATGC  
TGATATATTTGAATTCATTTTTAAGAAAGTGCTATGCCATTGTCGACGTCTCAGTTCTAG  
CAATTAACGTTACTTTTTTTTTTTTTTAAGTGAATGGTCAAGTTTCTCCAGTGTACTCAA  
AACAGTCACTTAAGGTTCTCCAGACTTTTCATATCAAGCTGCATGGATTGAATCCCCATT  
CTTGTA AAAATCCAAAGTTCGCCCAAATTCACAATCGCTGGTGTCTTTCTCTGCTTC  
TGACACAGATATTTCTCTGTCCCTTCTGTCCCTCATTACCACTCTGGTCTAGAAAACCA  
CCTGTCATGCAAACAGCCACGACCTCAAGACTATTACAGTAGCAACACTTACTCTAATGC  
CATAAAAGACAAAGTTAACAAATGTCATATACCATACAATGTGCTTGAAAATCTACTTGA  
ATACTTACAAGCGTGCTACAGGAAATATCACCTGATTTTACTACAGAGCTATTTGGCTT  
CTCTCTAATCCAGTCGTTCCCAAACCTGTTGGTCGGTCATGACCCGTTGGGGAGGTCAAAT  
GACCCTTTGACACAGGTCACCTAAGACCATTGGAAAACACAGATATTTACATTACATTT  
ATATCAGCAGCAAATACAGTTATGACATAACAACAAAATAATTTTATGGTTGGGGT  
TACCACAGCATGGGGAAACATATTAGAGGGTCTCAGCATTAGAAAGACGGAGAACCCTG  
CTCAAGTCTTTTCTAGACCATACCAATGCCAGATTCTTATATTGCAAACCTGAAATCCCT  
TCACATTTCAAAGAATTGCCCATGTTTTCAGCAGGCTCTGCTTTGTTTAAGCAACATTG  
ACCAAGTCAGTTCACCTGCAGGGACCTCTGATTTAGCTACTCAGTTTACATGTATTGTTA  
CCTCTTTACTGTAATAAAGCATGGGTTGGTTTTACTTTATTCTGCAATTTATCATTTAA  
GAAATAAATTTATAATTATTGACAGGAACTACTAGGTTTTGCGTCAATACTGAATTACTG  
CAGTAACTGGTGATAGAGTTGGATCTTTTGA AAAACTGAGTTTATACATTTATATAAATA  
TGCACACTTTTCTTTAGCTACATATATACATACTTTCTACAGATTCTTCAAATTGATAAT  
ACAGGAACATTATTA AATTGTGTAAT

## Amelx\_FIMO

| motif_id                                                                                                                                                                                          | motif_alt_id      | sequence_name | start | stop  | strand | score   | p-value  | q-value | matched_sequence  |
|---------------------------------------------------------------------------------------------------------------------------------------------------------------------------------------------------|-------------------|---------------|-------|-------|--------|---------|----------|---------|-------------------|
| 1                                                                                                                                                                                                 | HTTCTRGAAVNTTCKYM | X             | 7322  | 7338  | -      | 13.2121 | 5.64E-06 | 0.149   | CCTCTGGAAGCTTGGCC |
| 1                                                                                                                                                                                                 | HTTCTRGAAVNTTCKYM | X             | 6200  | 6216  | +      | 12.1697 | 1.81E-05 | 0.16    | ATTCTAGTCAATTCTCC |
| 1                                                                                                                                                                                                 | HTTCTRGAAVNTTCKYM | X             | 9313  | 9329  | -      | 12.1697 | 1.81E-05 | 0.16    | ATTCAAGATGTTTCTCA |
| 1                                                                                                                                                                                                 | HTTCTRGAAVNTTCKYM | X             | 11880 | 11896 | -      | 11.6121 | 2.57E-05 | 0.17    | ATTCTGTAAAATTATTC |
| 2                                                                                                                                                                                                 | DGAANDDDCN        | X             | 9232  | 9241  | +      | 9.69697 | 2.65E-05 | 0.674   | GGAAGGTGCG        |
| 1                                                                                                                                                                                                 | HTTCTRGAAVNTTCKYM | X             | 11377 | 11393 | +      | 8.84848 | 3.66E-05 | 0.194   | TTTCTTGATGGTTCTGA |
| 1                                                                                                                                                                                                 | HTTCTRGAAVNTTCKYM | X             | 8924  | 8940  | +      | 8.31515 | 5.52E-05 | 0.243   | TTTCTAGAACATTCTG  |
| 2                                                                                                                                                                                                 | DGAANDDDCN        | X             | 7562  | 7571  | +      | 9.44242 | 7.72E-05 | 0.982   | GGAAGGTGCG        |
| # FIMO (Find Individual Motif Occurrences): Version 5.5.6 compiled on Aug 4 2024 at 17:26:56                                                                                                      |                   |               |       |       |        |         |          |         |                   |
| # The format of this file is described at <a href="https://meme-suite.org/meme/doc/fimo-output-format.html#tsv_results">https://meme-suite.org/meme/doc/fimo-output-format.html#tsv_results</a> . |                   |               |       |       |        |         |          |         |                   |
| # fimo --oc . --verbosity 1 --bgfile --nrdb-- --thresh 1.0E-4 motifs.meme Amelx_X_dnachromosome_chromosomeGRCm39X16.txt                                                                           |                   |               |       |       |        |         |          |         |                   |

>5 dna:chromosome chromosome:GRCm39:5:88633380:88656492:1  
GGGCTGGAGAGATGGCTCAGAGGATAGGAGCACTGGCTGTTCTTCCAGAGGTCCTGGGTT  
CAGTTCCAGCAACCACATGGTAGCTCACAAACCATCTGTGGTGAGATCCAGTGCCCTCTT  
CTGGCCTGCAGGCATACATAACAAGCAGACTGTATAAATAATAAATAAATCTTTAAAAAAA  
ATTTCAAGACTTCTCACCCCTGGGTTGAAATTCATTCATTTATGTGTGCATAGGCTTTTC  
CCTCCTGAAATAAAACACATCTTCAAAGGCTGGGGGAAGGAGGGTAAACTGAGAAAGCA  
ATCAGGAATGGAGTTTTGGTGAAGCTCCCAGTAGCCTATCTACTGAGGCCAAAATAAAGT  
GTCCAGATTCTGTGGGGGACTGCACGCATAGCTCAGGGCTGTCAACACCATACTCCATCC  
CCATTCCCTCTAAGTGACCTACTTCTTGCAAATTTATGTCAATGTAACAGTGTTATGCT  
CACTACTCAATTACTATAGAATCAGACAAAGGCAGCCTGACACTGCTGGCTTCCCTTTATC  
AGATACACCTTTGCAAATCTTGCATACATATAAATTGAAAAATATTTCTAATTTACTCAA  
AGACTGTCTTTAAGTTCTTTCTAACACTGTCTTATTCTTTGTATCACTAAACTTTGGAAC  
TACGGTCCCTAAAAACAGCTTTGTTGTATGGGCCAAGATGAGACATTCCACTCCCCATGC  
CTTGAAGAATGGTAAATATATAACCACTCGGTAGACAGAGACATAAGAAGTAGGAGACA  
GTGGCTGGAGGAGGACATCAGCCACCCACAAAACCCAAAATTTGACCTGCCTGCAAATT  
GCAGAGGGATAAAGATGGAGCAGAGATTGTGAGAACAATCAACCAATGACTGGCCCAACT  
TGAGACCCATCCCATGGGAGAGAGCCAACACCTGACATTATTAGTGGTACTCTGCTATGC  
TTGCAGACAGGAGTCAAGCATAACTGTCTTCTGACAAGCTTCATCCAGCAGGGGATAGAA  
ACAGATGCAGAGATCCCTAATCAAAGATCAGGCCGAGCTCAGGGAGTCTTATGGAAAAGT  
GGGGTATAGGACTGAGCAATCTGAAGGTGTCAAGGACACCACAAGAATACCTATAGAGTC  
CACCAACCTAAGCCCATGAAGGCTCACAGAGACTGAACCACCAACCAAAGGGCATGAAGT  
GGCTGGACCTAGGCCCCCTACATATTTGTAGTAGATGTGCAGCTTGGTCTTCATGAGGCT  
TGCTCAACAATCAGAGCAGGGGCTGTCTCTGACTTGGTTACCTGCCATTTGATCCCTTTC  
TCCTAGCTGGACTGCCTGGTTGGACCTCAGAGGGAGAGGATGTGCTTCAACTTATCCCAA  
GGCAGGGTGTACCCAAGGAAGGCTTCCCCTTCTTTGAGGAGAAGGGGGATAATGAGAGA  
AGGGATTTGTGAGGGTGTGACTAGAGGAGAGAAAGGAGGGGGCTGCAATCAGGATGTAGA  
TTGAATTAATTAAGTAATGAAAAAAGAAGTAGGAGACAGCTTTTGGCACTAACTTAGT  
TCTCAGTTTTTAAATGACAGCATTACACTAAGCAAACACACTCGGACAAATATGATCTAT  
TAGGAAGATATAGAAAGACCAGAGTAACTCAGGTCAACCAAAAATGCAAAGCTTGCTCTT  
GTCAGTAAAAAAGAAAAATTGAATTTATTTAGAAGTGAAGTCTTTGATCAGGATGTAAAGT  
GAATAAATAAATAACGATAAATAACAAAGGAACTAAAAACAAAACAAAAAAGTGAAGT  
CTTTTTTATAAAAAAAAATCATGTTGCAGAAAAAATAATACTAATCACAACTCCAAGTG  
AATTCCTCAACTACAGTTTTTCCAAAGTTGTATGATCATAAACATCTGAGAGTTACTTGT  
CATTTTGGCCAGCTCCTCTAAAAGTCTAAATCCTAACAACGAAGCTACATCTGATTTTTT  
AAAAAGAACTATACCCTAGGTTTTTATATAATGCACAGCAAATAACTGAGTTGGTTATA  
GATGTAACATTCCAGTTTAATTACGTATTAATATATCAACTAGATCCATATCATTCC  
AAAACCTTTTGTGTTGGCCAGTGATTTGTGTCAGTAGCATATGGTTAATAGTCACTTTT  
GTTCCCAAATATATTTGTATAAATGAAGTTTCTATACTTCAAAGCCCAAATTCACAAGG  
AAAGCACCTTCTAAATCTTACTGCTGTAAGCTTGTTTTTCTGAGCTGTTATTATAGATAA  
TAAGAGACTCCATTCCACAGGTTCTATAATAACACATTATAAATTTTGCAGTGGTTTTTT  
TTCCACTAACTCTTGTGATGGCAAACCATTTTTCTCAAAGCTGATTGGTTGTGCATGTC  
TACAACAGTGCTTAAATGTGATCCTGCTATCAAGCCTCCTGACAAGGAGGGATCTTTTTA  
TGTTAAGACTTTTTGGTACTGAACATGACACCTTCTTGAAGAATTTTTGTTTTATTATTA  
AGAAATAAATGTGTCTTGCTCCTTGCTCTCTGGCTTCTCAGCAGTTTGTAGTCATTTCT  
ACCATAGACCATTAAGAACATATTTCAAAGACAGGTTAACAAGGTTCAAGTTTACTTTTT  
ATCTAGTGCAGCTTCTAAGTGGCATTGGGTGAGTATCAAAGATTATCAACATATATTGTA  
TAGTGTTAAGTAATGTCTTGTATAGATGTTTGTAACTTTCCCTATTGATTTGTGGT  
GTTTCTAAATCACCTTTGTAGACTAACTTTTGATAAAAGTTTCAACTCTTAGTTTATTTG  
GTATTTGTTTTCTTGTAGTTTTTCTCCAAACTACTCTGACCTCCTTAACACTGTACCT  
TTGCACATTTCCATAAAGAAGTTTTGTCAACAATGCACTAGCAGTGTCTCAAATAACGAT  
GCCTGTCTCATTTTCTCTGATTTAGCTCTCATCCTAACCTTAAAGCTCCGAAGATTAA  
GCTCGGTTTTGAGGACCCTCTCATAAGGGTATGGTTGATGGTAATAAATGATTACCATG  
ATTTGGGCTAGCTACCCTTAGAGGTGAAGTTTTGGGATTTGGCTCACTTATTTGCTCTCT  
TTCCAAATTGGAGTTTTCTTCTCATACAAAAATCCTTATTTTTCCCAAAGGCTTATGAA

AGTTTTGGTGAAAACATGTTGCTGCTTCAGTGCAGAAATCCGACTTCTCCTCCAAAGCCA  
TGTGGCCTGGTGAGTATGCTCCCCATTTGTCTATTATCTCCTCATTTGTCAGACTATGAA  
GTTCACTAAGTGCACCTGAGAGGACAAACCTCACTAAAGTATGTAAGACAATGCGGAAGA  
TGCCAAAGTTTACAGTCGTA CTTCAGAGCAGCCTCTGAGTATTATTTTCAATCAAAAATA  
TAATCAAACTAATCAAAAAATCAGCTGTTACTCAGTTATATGTTCTTTTACGGGTAGAA  
AGGACTCATCTGACATAATTTGATAGTTTGTAGCAAAAACAAAGACATTATATATACACAAA  
ATAAGTGAAATGTCTCCTTTCATGGGTACAGAATCTAGAATTACTGTGACTCTACTGTAA  
AGATGAGATGAGATGGGTATCTGAATGAGATGAACACCCTGAGATACCAAAAAGCCTTGA  
TCCACGACCTGAGAGATGTTGAGAAAGGAGATCCTCTACCTACTCTCTTTTCACTTCCTG  
TGGTTTTGTAACCTACACTAAATATATCAGCCTCAGCAGTTACTTTTCTAAGGAAGAAAA  
AAAATATACATTTCTGTCTCTTCATTCTGACTTTGGCAAGTAATGTCTCGAAATTAACAT  
AAAGTCACAGTAGAATCTCTTTAGAGTTCTGAACTCTGACAGAAAAGCAAAGACATTAGT  
ATTAGTACCTAACTGCAGAGTGCCCAAAGCACAGTCATTTTCAATGTCCCAAGATAATAA  
TCAGTTTTATATTCTAGGTACCAAATGTAAGATGAGTCTCCTTGTTTTCTGGGTCTGC  
TTGGTGTCTCTGCTGCCATGCCAGTGAGTATTTACGCCTGTGTTGGGTCTTCCCTTTGCA  
CTCTGTTGTTGCTTGACTCAGGGACAGCTGGCAGATTATTTAGCTAAGGCTCTGCATTT  
CTCCCTCAGTTCCAGATGCCAATGCCCCGAATGCCTGGATTTAGCAGTAAAAGTGAAGAG  
GTATGTATTATATTCTGTACCGGAGGAGACACGTGCCAGGTCCTATCTAAAAGGTCAGGA  
AAAGGAGAGTATTGGTACTTTTCTTAGAAAATAAAAATTTCTTATGAATGGACTAAGGGAG  
GTA AAAATCAAAGTCTTGCATTCAAATCAAAGGAAAAAAAAAATCCCCGCCCCCGAGCCT  
GCTATGTGTTT CAGTGTTGATATATGTTAAAAATTAGTTGTTAGCTCTGGGGCCAGCTTT  
ATTCAGTAGTAAAGAGCCATTTGTACTTGGGAGTGTTATAAAGTACATACTTGATTATAT  
CTTTAGCATAACTCAACCTAGTTAGCATTAAATCAAATTTTCATGCTCATTAGAAACAGGAA  
TCTTTGTATGTTTGCTTGGGTGTTTTGGTTTGGTTTTGAGACAAGGTCTCTTTATTATGT  
AGCCCTAGATATCCTGGAACCTCTCATCCTTCTTTCTTAATTTGGTTTTGGTAATCAATAT  
CTGCTAGTTAATACAAAATTACAGTAGAATCCCTTTATATCTGTGAACTCTGCCTCAAAG  
AAACATTAAGGAGCTAGTGCCAAACCAACCGTAGAGTTATAGAGAGCAGGCTGGCCTTGA  
ATTCACATAGACCCATCTTATGGGATTAGAGGTGTGCCAGAGAAGCAGTTATCTTTTTAC  
CATGAAATTATCTTGTCTAAAATCCATAATTCTAAATAAACAGAACATTCAAAAGCTCC  
AAAGTAAATTATATTTATTTTCTATTATTCTATATTGATTCAATATGAAGTCTGACATCA  
AATTCAGGAATCTGGGGGCTAGAAAATTGTCTCAGTTGGTAGAGTTTGTGGTACAAGGGT  
GAGTCTGATCCCCAGAACCTCCAAGTTTGGTGACAGTCACTTGTAATCCCAGCACTGAGG  
AGTGGGAACCTAGAGGATTCATGGACCTCCCTGGCAAGCCAGGGAGGAAGGAAAACCCAAA  
ATCAAGGAATCCCAGATACTAATGAAACTTAGTCTCATAACAGAAGGTAGATACCTCCT  
AAGGAACAATATTTAAGATGCCAGCTTCCATATGCACACATATGAACACATATACAATCC  
TGTGCACATGGGGCTGAAGAAATGGTTCAGTGTTATGAGCACTGGATATTCTTCCAGAA  
AACAGGGAATTTGATTCTAGCCCCTACATAATTATCTGTAACCCAGTGCCAGGGAGTC  
TGACATCCTCATATGTCTTCTTTGTACAGCACACACACACTGTAAGGCGCAGACATAT  
GTGCAGGCAAACCCCATACACATTAATAAATGTTTAATTTTTTTAAA ACTATACATG  
TATAAAAATTACATACTCCAGAATTTTTTAATGAATACAAATTTTAAAGTAATATATAAT  
TAAGAAATTATGACTATTGTATCTTCAGACCATGAACTCGATTTAATTTCTTCTGTTTCGT  
GAGTTAATTTGAACAAAAGCTTTTCATTTTATGCCACATTAATGGATTCCTTTCAATTTCA  
GATGATGCGATATAATCAATTC AACTTCATGAATGCCCCACCAGTAAGTCCTTTATACTG  
TTTCTGACACTTTCTCTTTTATATCCAGAAGCTGGGCTGTGTTTGTCTTAGCAGATCACA  
GTGCTAATTACCATCCACAAGTCTTAGTTAAGATAACCATTA AAAATAGTGAAGGAGAAAA  
ACCGCTTCATTTGTTCTTAGTGACAAACATTCTTAGTCATTTCTGGGTTTTTTTCTACA  
AGTGAACATCATCTACTAATAACAAATATTCGTTGTGTCTCAGAAA ACTGTTCTCACTAA  
AGTTTCTAGGAGCTTTGCACACGACCAATGGCAACCAACACAGGATAGTGGATACTATTT  
GAGGAGAGACCTCTGTGTTATCTTACACAATTCTAAA ACTGTGAATCTTTTTGTATTTG  
CTGGAGTGATCATGGGATATACTTGTGGTTGTATGCTAATTCTAGAGCAA ACTAAACCAT  
GACCGTCAGCTCATCTTCTAATAAGATTGTGTGAGGGGGAGTGGGTGGGCAGGGGAGTGG  
GGGTGGGTGGATATGGGGGACTTTTTGGTATAGCATTGGAAATGTAAATGAGTTAAATACC  
TAATAAAAATGGAAAAATAAATAAATAAATAAATAAATAAAGGATATAAAGCTAAAAAAA  
AAAAAAGATTGTGTGATAGCCCAAAAATGCATATGTCATACTACTGTGCTGATGTGGTT

ATAGGCTTCCTCGATTCTGTCCTAACCTTTCTGTTTCAGTGACTGTCTTAAAGTTTTTACC  
TAAAGTCATCATTTTTCAATGCTCCCCTCCTAGATTCTGGTTGGCCCAACTTTCCTTGCTG  
TTTTTGTGTCTGTGAACTGAAATTTCCACCAATGTAAAATCGTGCATCTGTTTCCGGGTT  
TTGCTTGTGTTTGGTTGGTTTTGGTTTAGGTTGTTTTGGTTTAGGTTATTTTTCATTTTG  
GTTGTTTTATTTCATTTTCTCTCATTTTACCTGGCCTTAGATATAGCAAGTCACATGAG  
TTTTGAATTTCCATAAAAAATATATACTCAGAAAAACATAAGATTCTTATGCAAGGTGT  
GGTGGTACACCCCAAAAATCTCCACACTCAGGATTTTCAGTGACATGAAGATTGCTGTGTG  
TATGCATGTGTGCAGACAAAGTGTGTGTGTGTGTGTGTGTGTGTGTGTGTGGTTCAGA  
AAACAACCTTAGAGCATCCGTACTTGCCTTTCACCTTTCCTTGAGACGGTGTCTCTTTGTTG  
CTTACACTGCACATACCAGGCTACCTGGACCATGAGCCTCCAGGGGTTCTCTTGCTTCA  
TTTCTTATCTCACCATAGGAGCACTGGGATTATCACACTATTGTGCCCAACTTTACATGC  
ATGGTTCTGGCTAGACAGAATCAGGGTCTCACATTTGTGCACCAAGCACTTTGCCACTA  
AGCCATTCTTCAGCCACCAAGTTCTTGAAGTGCATCTCTTATTGAAGTCTGCCTTTGAT  
TCGTTTGACAGGCTTTCTAGAAAACCTGAGGTCTCATTTCAGTAAGACAAAATGAAATGAAG  
TCTTCGTTAAAGATCTTGAATCAAATTCCTGAGTTTTAAGCTTCTTGACTTGGTTT  
TGGAAGCTTGACTTTAGAAGGTGGGACGAAACTGGACTTCAACCTCATTTCGCTGTTACTG  
CTTTTGCTGCTCTTTCAGATGATGCCTATGGGCCATATGAAATGGTATGCCAATGCCG  
CCACACATGCCTCCACAGTACCCTCCATACCAGATGCCATGTGGCCTCCACCAGTACCC  
AATGGATGGCAGCAACCCCAATGCCCAATTTCCAAGCAAGACTGATCAAACCCAGGAG  
ACCGCCAAACCAACCAGACCAATCCACAAGAGCCACAGCCACAAAAGCAGCCTTAAAG  
GAACCACCAATGAAGCAGCACGGGCCAAAGATGACGCCAGCCACCTCAGGTGAGGCTA  
GAGCAGAAAACCTCCATATCATATGCATAAGCATACTTAAAAGAGAGGTCCCCACCTGT  
CCAACATACATACTTCTCCTAAATTTAGTACAGGTATTGCTATGTAAGAATATGATATT  
TAATTTTGACATTCATCAAAGTTGCCTGGCAGGTCAACTCCAACCTTATTTAGTTCAAT  
ATTACACAAATATTATTGCCTTAAAGATCCTTTTTAAAACACAGAATCAAGCTGTGGTTGT  
AGGATATGCCGATAACACCAGCAATAGGAAGGCTGAGGTAGGATCATAAGTAGAAGGCCA  
CCATGGCTATGTGGTAAGATACTCCTTGAAAATAAATAAGAATAAAATATAATACAGTCT  
TGCAATATAGAGTCTCATGACTACTAGTAGAAGAGTCAGGAAAGAAAGATAAAGTTATAC  
CCCAGCCTTCATTGGTCAATTATACATATAACAAATACAACTTAATAAAAAAGGCACTC  
CTAGATTTGAATCTCGTTTTCTGTCAATTTCTCTGCCATTTGGGGCAACTAATTTCTCTGA  
CCTTCAGCTTCTCAAGTGAAGTGAAGAATAACAATGATGCAAGGTTGAAATCTGAAAGAGT  
CCCATAACCAACTACCATTTGAATACAAGTGCTTAATAATATGACTATTACCATCATCTC  
TACTCAAATATGCAGAGAAGGAGGGGAGGGGAGAAGGGGTAGAAGAAGAGAAAAGAAAAG  
AAATTTGATGCAAACAAAAATACAAGCTGTCTCTAGTTTTCAATAATTATTATCAATTT  
CTGTCAATTTCTCATTTTCAATGTCACTGCCAATAACTTTAATTTGTCTTTCTTTCTAGC  
CATTCCCACCATTTGGCAATGGACTTTACCCCTATCCACAACCACCATGGCCAATTCAC  
AGGTAAGAACTTTCTATATGCTATAAATTAATAAATAATATCAGTATGTAAAAATTAACAT  
AAGTTTACATACTGACAGCAGAGAATATGAAACAAAATCAAGTTAGTAATTATTCAAAAA  
ACTGATTAATAATTGAATATATGTTTTACTCAGACCAGTTTGCAACATGAACAGAGTCAC  
TAGTAACATAATTTAACTGTTTAAATTTAAATGGTTGACTATAATGCCTCACAAAAGAA  
ATTAATAATCTTCATTGAGTATCATAATTTATCATAATGCAAAATAGCACTAGACAAGA  
AGAGAGTTTAAAACCTAAGAAGCAAGCCATGATTACATTGTAATCTCCCCATCATATTTTT  
TTCTATCAACACAAACGTCATTATAAAGAAATCTGCAAAGTAATACATGAATTCTCAAAG  
AGTTCTTAAAGTTTTAAAATTAACAAAATAAAGTATAATATTTAACTTATTTGCACAAAA  
GAATAGTAAAGGCAGTGGTTTTCAACCTTCCAATGCCAAACCTTTAATGCAGTTCCTC  
ATATTGTGTGACCCCAAACTTATTTTATTTTCAATTGCTACTTCATAACCATGATTTTAC  
TATTGTTTTTCAATATAATGTAATGGCTGTGTTTTCTGTGCTCTTAGGTTACCTCTGTG  
AATGGGTCATCCAACCCCAAGAGGGTTGCAACCCACAGGTTGATAACCACTGAGTAACA  
CAAGCTGTGCAAAACAGCTACACACCAACAGTACTCAGTGACTGTTTACTTGGCTATGG  
AACAGAGTGTGTTTGTGTTTGTGTTTGTCTTGTAAATTTACTGATCAAGAGGGTTTTAA  
TGAGAAAAAATTCCTCCTTACTCCTTTTCTTAAAAGGGTGGCTTTGCCACATTAAGG  
AAGGAAACATTCCAGAGAGTTTTAAAAGCAACATGATTTCCATGTTGAAATGACTATTAAT  
CCCATTACATCAATCTCTTGATGAGAAGCAAAAACCTGCTTCTCAACCCTTGCTTCTATGT  
AACTATCCCTAAGCTTTCATTTCTTAAATTTGATGTAATTTTATTTTTTTTAACTTTT



GACATTAGTATACAAAATCCCAGTTTTGTTATAGCACCTTCTGTGTTTGTGTGTTGGTAT  
TGTGTGTCTGTGTAGGTGTGTGCCCTGTACACATGTGGAGACCAGAGGATGGTGCTCAC  
TGTCTTCCTCAGTCACTCTCCACCTTAGTTTTGAGGCAGGGTCTCCTACTGAATCTGGAG  
TTCACATCTTTGGTTAGGCTGCCTGGCAACCAGCTCTAGGGATCTGCCATCTCTGCTCC  
CAACACTAGAAGTGCAGGTGTACGCCAGCCTTTTTATAGGGAAGAGTGCTGGGAATCT  
GAACTCTCGGGTGTCTCAGCTTTCATGGAAAGCAATATTCCAAGTGTCTCTTTCAGC  
TCCTCAGCACAGCACTTCCACATACATTTGCCTTCTTACTTTTTTCTTTTTTTTTTTTT  
TTTTTTTTTGTGTTGTTGTTTTTTGCTTTTTGAGACAGGTTTCTCTGTATAGCCCTGGC  
TGTCTTGAAGTCACTCTGTAGACCAAGCTGGCCTCGAACTCAGAAATCCGCCTGCCTCT  
GCCTCCCGAGTGTGGGATTAAGGCGTGCGCCACTATGCCAGTTTTTTTTTCTTATTC  
ATCCTCCTCACCAGTACGTTGTCTCCTCCTGGCTCCTCTTTTGTGGTTGCTTACCTT  
GCTTCTAAAAGTTCTACTTTTCACTTTTATGACACATATTTTTTATTAGATATTTTCT  
TCATTTACATTTCAAATGCTATCTCGAAAAGTCCCCTATACCCTCACCTGCCCTGCTCCC  
CAACCCACCCACTCCTGCTTCTGGCACTGGGGCATATATTTTACTTCTTTTCTGC  
CTCTCTTACTTCTTTAAGATCTTTCATCCCCTTTATGGGCCCTTCTACTTTAC  
TGAGTTGAGCACATGTGTACACACATACATGTGCGCGCACACACAATCTAGAATCCAC  
ATGTAAGCAAAAATGTGGCATTTTTTCTTTAAACTCAAACATATTATGCTTAACGTGATG  
ATCTCTTAGACCCATTTTCCATAAGATGTCATTATTTTATGGCTAATTAATTTCTTTGT  
GTAGACTGGTAGTGGTGAACATGCCTTTAATCCAGCACTTAGAAGGCAGAGGCAAGCA  
AATCTATGTGAGCTCAAGGGCAGCCTGGTCTACAGACCAAAGGCTATGCAGAGAAATCCT  
GTCTAAATAAATAAATAAATAAATAAATAAATAAATAAATAAATAAATAAATAAATAAATTC  
TTATGTAATGCACATATCTTACCAGTTAAGAATCTTTGTGATATGTCTAGTGCTGC  
AGATATAACCTCAGAAATGGTCTGCGAGGTTCAATAGACAGCTCTATTTTTAGATTTGT  
GAGTAACTTCCACTCTAGCAGCCGTAGTGGCTGTGTCACTCCATATTACCCTTGCAGTT  
TCTAACAGTCTCTTCCCACATCCTTGAGAGTGTTCCTAACATTTGTGTGCTGGAATG  
AAAATTTTCTATGTTGAGATGCTATCTTAAACAATTTAAATTTAGTTCTGATAGTAAGG  
AATGTTCAATATTATCATAATTATTGGCCATTTGTATTTCTCCTTTTATAGTAAAGTGTCT  
CCACTCCATTAGACCATTTACTATTCTTTAATATTCAATGTTTGCAGTCTTTCTACA  
TTCTTACATTTATCTCTTAAAGTATAGTTGGCAATGATTCCTTCTCACTCTGTAGCCAGT  
ATCTTCACTCTGGTGAAGTGTATACTTTGATATGCAAAAAGCTCTTTAATCTCATGTAATC  
CTCCCATTTGTCAATTTGGAAGTCTACTGTGCTACTGGAGTCTTTGTCAGAAAATTCT  
TAACATGTCTGAATCTTAAATACTTTATATGTGTTTTCTTTATTAGCTTCAAGTCTTA  
CATATAAGCTTTCCACACATTTAGAGTTGGTTTTGGTGTAAAGGTGAGAGATATGGACTTA  
GTTTAAATCTTCAACAGATGGATAAAGTTTTCCAGCACCATTTGTTAAAGAAGTTGTCT  
TTTTTTTGAATGTATGTTTTGACACCTTTATTGAAAATTAGGTGTTTGTAGATATGTG  
GGTTTAAATCTGCATTTGATTTTTCTATTTTTCTGTTTTCTTCTATTTTTCTGTTTGTACC  
AATGTCATACTAAATTTGTTACTATAGCTCTGTACTGTATAGAGCTATATCAGGTATAGT  
GAGATTACCAGAATCTCTTTCCATTTAGAATTTTTCTACTTATTTAATCCTTTGTATTT  
TCACATAAAAAATTGTATAATTATTCTTATTTCTGCAAAGGATATAACTGAAATTTGAT  
GGATATTGAATTAAGCATATGGATCACTTTTATTAATATGATCATTTTATAATCTTGAGT  
TGATAAATCCATGTACATTGACTTTTTCTTATATGAGAATTCATTTTTGTTAAGAAAATT  
AACTTCAAGTGTACACAAAGAATGTTAAATATAACATTACAATTTAATCTCATATTGTTG  
TGTGCTCTAATATAGATACTTGGAGCCCACTATTACTCAAATATTAATATCTGTCTCTAT  
CTTTCTCTCCTTTCTCCTCCCTCTTCTTCTTCTTCCCTCCCAGAGATAGTGAGGTAAG  
GTGATTGATAAGACAGGATATTTTTAATAAGATAGCCTAGGGTCATCTTACAGCTTTATA  
AAAATAGTACTCACAAATGGATCATAAGTATCAATAGGTAGTTAGTGAGTTCACAAAACG  
AAGCATCATGACTAATGAGCCAGTTAAACATACCTCCTGACTTACAAACAAATGGCAACA  
TAGAAAGTGCTTTCCAGAGCTGAGGAGTGAGCTTAGCGGGTCAAGTGCTTGCTGTACAAG  
CATGAAGACTTGAGTTCAGATCCCAGCACTCCCTCTCAACCCTAGTGCTGAGGAGAGGA  
GACAGGAGAATCCCAGCTCTTGCTGGCTCAGCTACTCTAGCCAACCAGTGAGCTCCATGT  
TCAATGAGAGATCCTACCTCAAAGGTAAAGTGAAGGAGGAAAGAAGACAGCCAACACCA  
ACCTCTGGCCTCCACACACGTGCGCACATGCACATGTACACAAACACACACGCACAAGCA  
CACATAACACACACAATCATAACACACATATGCACGCACATACAAACACACACATACACAG  
ACAATCACACACACAAACACGCACACATAGACACAAACACACATATACATAAATCACAT

ACACATTTCTAGTCCAGTCTAATGGTGCACAACCTGTAATCCCAGCACTTAGAAGGCTGAG  
GCAGGAAGATTGCCAAGAAGCTCAAGGACAGCCAGATCCATAATGGTCTGATATAAAAC  
AAGATCCTGCCTTTAAAACAAAGAGAAGAAAGCAAAGTGGTTGGTTCCTTGCTCACTGTG  
CTCTTCATCTTTAGAGGGGACCACCAACAGCGTTTGGACGGCCAAAGTTCAGCAATGAA  
GAAGGAGTAAGTACGAGTGGCTCTGTACCCTGGTTAAGAACTATAGTCTATCAGCTGCT  
ATCATTTAACCCAATGCCACAAGAAGCTTAAAACCATCGCTAAAAACGTCTTTAACTCGAG  
CTCTCAAGTTTTTTTTTTTTTAAAGTGAAATAAAATCAAGCCAGTAGTGTGACTAAGTGTGA  
TGCAGTGTGGTTGTGGCAGCACCGCCTAGTCTCAGCACAGCAGGCAGCTGCGTGGCTT  
TGTCCCTAAACCCAGCACCACTTCCATGGTGCATAATCCCTCTACATGGATTGAAAGACT  
GTACACAGATTTGCTGTGGAACTATTAGCTTCTTTGCAAACCTGATAGTGAACCCTAGA  
AAGTGAAACACACAGAAAGAAATTAAGATCATCTTAGAATATTCTCTTCACAGGAACTA  
CATTATTGTCTAAATATCTCATTGAATAAATACTGAAATCCAGAGAACATAAATTAATAT  
CCAATTTTTCTCTTGGGTTACAGGATAAACTGGACCAAACCAAGTCTTATGATACGAT  
ACCATTTTTACTATATTCCAGGAAAGTAATCAAGTATGCCAGTATGCCAATTCTTAGTA  
TGTCAGCAAATAAACTGTTCTCGTGGTCCACCCTGGACTTGGCTTACTCTTTACCTCTAG  
CTATGTGGCATGCACTCCGTGAAGGCAGAAATGTACACCTTTGCCGGAGGAGGAAGGAGC  
AAGGTATCACTAAAGTAATGGTGGTGAATATTATTTCAATAATATCACGGGACGTTTAA  
AATACTATATCACTATAAAATACCCACGTAAGAGTGTCTCAGGCCATTGTATACAATACC  
CTTACTTAGAACTAGAACTTCAGATTTTCATAAAATTTAGCAAGTAAAACAGAGTAATT  
CAGACATAAACATAGGCTTAAATCTGTGCCTATCTCTTGGGAAAACCTAAGGCTGGGGAT  
ATAGCTCAGTAGTAGAAGACTTAACTACCATGCCTATGTTTAAATCACCAGCACAGGGGAA  
AAATTAATAACCAAATGATACACACGTCTAAAAAAATCACATAGGTTGTTAATTTAATT  
CAAAATTATTAAGTATTTCCCACTGGTCTAGAAAACCTAGAATAGCAAGACAATATTTTTA  
CTTGAAAGCTTCCCATGGAGATGTCAAGTGGGAGGAGCCAGTGAATAAGCAAGTCAAA  
CCTGCTGCGCTGGTAACACAGCCGAAGGCTGCAGACATGAGCAGCAGAGCCTGAGTCCA  
GCACTGTTCCAGGAGCCAGGTGCACCTGGCTGTGGCACTCAAGCTGCATCTTGAAGTCAA  
GTGTGCTGGGAGGGCTGAGGGTGTAGGTGGGAAACAGTTAGATAGGGAGAGGCCATGTGC  
AAAGACTCAAGAGAATTAACAGCGGAGGCAATTTGCAACCACATCAAAGTTTAAAGGAAGA  
GGAACCTAAGGTTAAAGGTCATGGCCATGACTCAGATGATTGTAAGTGTAAAATGTTT  
AGTTCAATATGTAGCATTTATTAGAAAACAAAATTCAGATATGAAGATCTAGAGAAAGAT  
ATAGATATATTCTCATTTGACTCTCAGGACAAATTGTATGGTTTTTACTATCCTATTATT  
ATTGCTCCATATTACAATTGAATAATGTGAATTTAGCCAACAGTTATAGCCCTAAAAGT  
TGTAGAAAGTCTGCATTGCACATGTATATAGCACCAAGGCATTCTGCTTTCTGTTATGC  
TAAAGAATTTATAGTTTATCCTTTAAGGGAAAGGCAATTCTGAACACATATTTAAAGAGA  
AAAATGTTTCCATTCCAGAAACAGACCCCTAGTGTCTCCTACTCTGATGGAAATCATAA  
AGTAAAGTAAGATTACACATACAGTGGTCACTGAGAAAGCAATGTCAATAGTTTGGGAGT  
GGTAGGCAAAAAAAGACAGGGCAAGGCTGAAAGTTCAGATAGAACGTTTGGACTTGGTA  
ATTAAGTGTCTGGGAAATAAGATAGAAAGCAGAAGCTGGGGCAACTGGGTTTGGAGATTA  
GAAAATGCTCCTTAGATGCAGGATAATGACGTTTTATGGGGAGATGAACCCAGTTCTGGGT  
GCATTCAGTTGGAAGAGTCTGGAGCCTTACTCATTGGACCTTCGGCAAGAAGTGTAGGAC  
AGGCTTTTGCCTTTGTGAAATAAAAGCATGTATCCATATTTGAAGTTCAGGCTCAGCAAC  
ATAGGAGAGTAAAATGAGAGCACAGAAATGAGGAGAAAAGGGGATGGAATCAAAAACAAA  
AACTATTAATCATGATGTTGCCCTGCCTGTAATCCTGGCACTCTGAAGGCAAAGACAGGA  
GGATCCCTGCAAGTTTTGCACGACACTGATCCACATAGCAAGTTACAGGCCAGCCAGGGT  
TATATGGCAAAGCTCTATTTCAAAAATAAATAACTAGATACAATATCAAGAATTATAACA  
GTTAACTTGGCACTGTAGCTCACATGTGTAACCTCAGCACTCAGGGGCTCAAGCATGGG  
GGTTTTACACATTCAAAGCCTAAGCAATAGTCTCATACTGTGAGATCCTAGATCAAAAA  
GCATTTTAACCTAAGGTTTCAAGGATGTGGGCCTAAAGGCTAGAGAGACTACTCAGCACA  
AAGGGTAGAACAGAGGCCCTCGAACATCTAGAGGAGAGTGTAGGCTGTCATGGTATGAGAA  
GCCTGTGGAGGAACCTTTCCAGTTACACTAAGCAATTCGAAGCAACACCATGGAAGCAAG  
CAAAGAATGATTCTCCTTTCTGTCTTCTTTCTATAGAATCCTTACTATGCATTTTTTTG  
GATATCACGGCTTTGGGGTCTGCTCTTATTACTCAGAAGAGATGTTTGAAGATTATGAAA  
AACCCAAAGAAAAAGACCCTCCTAAACCAGAGGCCACCTCCAGATGACCCACCCCCAG  
AGGCTCTACAACTCAACTGTGCCTGATGCTAATGCCACTCAATCAATTCCTGAAGGCG

GAAATGACTAGCCCAATAGGAAACACAGGCCCTGGGCCGAACGCTGGGAACAATCCTA  
CAGTTCAAAACGGTGTCTTCCCTCCCCCTAAAGTTAATGTTTCAGGCCAGGGAGTACCAA  
AAAGCCAAATTCGTTGGAGACCAAGTCAGCCAAATATTTATGAGAATTATCCTTACCCAA  
ATTATCCTTCAGAAAGACAATGGCAAACCACTGGTACCCAGGGGCCTAGACAGAATGGAC  
CTGGCTACCGAAATCCACAAGTTGAAAGGGGTCTCAGTGGAATTCCTTTGCTTGGGAAG  
GCAACAAGCTACTCGTCCAGGAAACCCAATTACGGTAAACCTCCCTCTCCTACCTCCG  
GGGTTAATTATGCAGGAAATCCAGTCCATTTCCGGAAGAAACCTGCCAGGGCCAAATAAAC  
CCTTTGTGGGAGCCAATCCGGCCTCAAATAAACCCCTTTGTGGGAGCCAATCCGGCCTCAA  
ACAAACCCTTTGTGGGAGCTAATCCGGCCTCAAACAAACCCTTTGTGGGAGCCAATCCGG  
CCTCAAATAAACCCCTTTGTGGGAGCCAATCCGGCCTCAAATAAACCCCTATGTGGGAGCCA  
ATCCGGCCTCAAACAAACCCTTTATAGGAGCCAATCCGGCTGCAAACAAACCATCTATAG  
GAACCAATCCAGCCGAAACAAACCATCTATAGGAACCAATCCAGCTGCAAATAAACCCCT  
TTGTGAGAAACAATGTAGGTGCAAATAAACCCCTTTGTGGGAACCAATCCCTCCTCAAACC  
AACCATTTCTGAGAAGCAATCAGGCCTCAAATAAACCATTTATGAGAAGCAATCAGGCCT  
CAAATAAACCATTTGTGGGCACCAATGTGGCCTCAGTGGGTCTAAACAGGTCACTGTTA  
GCCACAATATGAAAACCTCAAATCCAAAAGAAAAGTCACTAGGTCAAAAAGAAAGAACAG  
TCACTCCTACCAAAGATGCAAGCAACCCCTGGAGAAGTGCTAAACAATATGGAATTAACA  
ATCCAAACTATAATTTGCCTCGCTCTGAGGGCAGCATGGTAGGCCCAAATTTTAATTCCT  
TTGATCAACAAGAAAACCTACTTCTCAAAGGAGCTTCCAAAAGAGTACCAAGTCCTA  
ATATACAAATCCAAAGCCAGAATTTGCCAAAGGAATTGCTTTAGAGCCAAGAAGAACCC  
CATTTCAATCAGAACTAAAAACCTGAGTTAAACATGGTACACACCAGCCTGCATACC  
CTAAGAAAATCCCTTCTCCTACAAGAAAACATTTCCCTGCTGAAAGAAATACCTGGAATC  
GTCAAAAATCCCTTCCACCCTTAAAGGAAGACTATGGGAGGCAAGACGAAAATTTACGTC  
ATCCGTCCTATGGCTCTAGAGGAAATATTTTTTACCATGAATATACCAATCCTTATCATA  
ATGAAAATCACAGTACATTAAGCAATCCATGGGATAAGAGCTCTCCAGTACTATGA  
TGCGGCCAGAAAACCCACAGTACACCATGACTTCTCTAGACCAGAAGGAGACAGAGCAGT  
ACAATGAAGAGGATCCAATTGATCCAAATGAAGATGAATCTTTTCCAGGACAAAGTAGAT  
GGGGGGATGAAGAGATGAACTTCAAAGGAAACCAACAGTTAGGCAGTATGAAGGTGAGC  
ACTACGCCTCAACCCTAGCGAAGGAATACCTTCTTATTCTTAAGTAATCCACCAAAC  
CCAGTGAAGATTTTCTTACAGTGAATTTATCCCTGGAACCCACAGGAAACGTTTCCAA  
TATATAACCCAGGTCTACTATAGCACCACCCGTGGACCCAGAAGTTATTATGTTAATA  
ATGCCATAGGACAAGAAGAAAGCACTCTCTTTCCTTCATGGACCTCCTGGGACCACAGGA  
ATCAAGCTGAGAGGCAGAAAGAGAGTGAGCCATATTTTAAACAGAAATGTCTGGGATCAGT  
CAATAAATTTACACAAATCTAATATACCAAACCATCCTTATTCCACTACATCCCCTGCTA  
GATTTCCAAAAGATCCAACATGGTTTGAAGGTGAGAATTTGAACTATGATTTGCAAATTA  
CTAGTTTAAAGTCCACCAGAAAGAGAACAGTTGGCTTTCCAGACTTCTGCCTCAAAGTT  
ACCCAACAGGTCAAATGAAGCACACTTATTTACCAAAGTCAAAGAGGGTCTTGCTGTA  
TTGGTGGCTCCACAGGACATAAAGACAATGTGCTGGCTCTACAAGACTACACTTCATCCT  
ATGGTCTTCCACCAAGGAAGAACCAAGAAACAGTCCAGTGCATACAGAAAGCAGTTATA  
TCAAGTATGCAAGACCTAACGTTTCCCCAGCAAGCATCCTACCTAGTCAAAGAAATATCT  
CAGAGAACAACTAACTGCAGAAAGCCCAAACCAAGTCCATTTGGAGATGGTGTGCCTA  
CTGTGAGGAAAATACTCCATATTCTGGAAGAATCAACTAGAGACAGGAATTGTGGCCT  
TTTCTGAAGCCAGCTCTTCTCAGCCAAAAACACGCCCTGTCTTAAAAGTGACCTTGGAG  
GAGATCGGAGGGATGTTCTGAAACAATTTTTTGAAGGCAGCCAGCTGAGTGAAAGAACTG  
CTGGCCTTACTCCTGAGCAGCTCGTCATTGGTATTCTGATAAAGGCTCTGGCCCAGATA  
GCATACAAAGTGAAGTCCAAGGAAAAGAGGGTGAGATGCAGCAACAAAGGCCACCTACCA  
TCATGAAGTTGCCATGCTTTGGCTCCAATTCAAAATTTCACTCTTCTACCACTGGACCTC  
CAATTAACAACAGAAGACCAACCCTACTTAATGGTGCTCTCTCCACACCCACTGAAAGTC  
CTAACACATTGGTTGGTTAGCTACTAGGGAACAACCTTAAAAGTATAAACGTAGATAAAC  
TTAATGCAGATGAACACACTACACTCGAATCTTTTCAAGGAACCAAGTCCACAGGACCAAG  
GCTGCTTACTGCTTCAGGCTTAGGGATCGCTTCAACTGAACATCCTTGGGGGATGAAAAA  
AAGAAAAAACTAGCAATCCTATGTCAATGATTCTGCAACTTTGTACCCTGAGACTTGAT  
TACCTTCTTATGACCCCTAAGCCTTTTTCTCTCCAACAGTAGAAATAGTGGCCCAGGTA  
GAGTTAATGAGATTGGGCCTCTGGGGCTGGCTGGATCCAGCACTGTAACAAGTTAGTGCT

CACTTAAGAAAAAGCATGAAGGCCATGACCATTCTGCCTTGAACTTGGAAGCTATTTG  
ATTGTCTGAGTTAGTTCCTCTTTCTTGTTAACTTATCCTGTTTCTCTCAAATTACTTAC  
AATGCTCTCTGGTTTTGCACGTCTAGCAGGCTGTTGAGTTTTCCATTTTCATACAGAGAT  
CTGCACACCAGTATGGTCCTTATGCACTCTTTCCTGTATGTTGTTTCTGTGTGTTCTATT  
TCTAGTTAAGAGTCTCTTTGGCATGTTTCTCCCACTGTCTCCTTGCTCTCTTCTCTCTG  
CTTCTTCTCCATGCAGCTCGGTGTCCCTCACATTCTCTCTGTCCGTCGTTTCTCACA  
TGCTGAGATACTGACTGGCACCCTGGCAGTCCCTTATGTCTGATGACCCCTTCATGATT  
TCCTTTCCCTTCAATTTTCTGTTCTGTCTCCAATGTGGAACCTTGATCTTTTACCAAAA  
TTAACCTTCTCTCTATTTTTGTTAAATTTCTTTTCCCTCACTTTATATACAGTT  
TTCGTGCGTTAAGACTATACATCACCTTCACTCTCTGAATCCACTCTGCAAATCTACTC  
TCTTTTCTCAGCCAAACATCACTGTAGATAACACGTCTGAAATAGCTGCTTTTGTGT  
TAATTTTCTCATGACCTCTCCACATAGACACCCTGGTTGTAAGCACATTCTAGGAGAA  
TGGAAGACAGCCTAGACACCAGATAGATCATAGAGCTTAGGAAAGTGAAAATGAAGAAG  
AGAAGAAATTGTCGCTCTGGGACTGAGCATCTAGGAAAAAGACTCTCACTGTACTGTGT  
CATCAATTTTCAATCTCCAAGATCTGCAGAGGACATTTCTTGAAATACTACCTTATGCAG  
ATAAAGCACTCAATGTTTAGTTTTCTCTACTAGTTTCAATATAAATTATTGTACCATTATA  
TATTATGACTATTATGTTTATGCTTCATATCCTTGTAGATTTTTCCAGACACAACCTCC  
AGGTATCATGATTAATAGTGTAAATTTTTGTAAAGTAGATATTTCTATATTGTCTTG  
CTTAGAAAATATTTGAGTTTTATTGATATTTTTTACTGTTATTAAGGCATTTTGGCC  
TGTTATCTGAATATTTCTGTTTTGAGTCTGGGTGTACATTTTTTTTTCTAAATTACCTAC  
AATGTTACTTTCTATTCTAAAGACTGTCTTGAGAAAATGTTCTTTAATAGATTTTATA  
TGACCCAGAAAATTTGGTGAACCTTCTGAGAAAATTAACCTTGGCCTTGACTCCAGTA  
TAATGTCTTACCAATAGGAGATTCCTAGTAAACGTTTACTGGTTGGCTGTAGTGTCACTG  
GCTCTTTAATGCATGTAAGCTCACACCGCCACTTACTCTTCTGTGAGAGGTGTGCAGGG  
ATGCAGAGGAAAGCACCATGTTTCTAGCCTTGTGTTTCAAGACACCTGCCCTGGCCAC  
TGCAGACTGTGCTGCCGCTGATGGCCTAAGTTCCCTCTCACCTACAGACTGTGCTGCC  
GGCTGATGGCCTAAGTTCCCATTCACCCTACAGTTTGATACTTCACTCATATTTAAAACA  
ACAATAACTAGCTTTACCCAAAAGTTTACAGTGAATACTTGTACTATCAAATGTTCA  
CTTTGTGTTTACCATAATGAATGGGTAGCACAGTCATTTTGGCAAATAGTATCATGCCA  
AGAGTGATGAGCCCAAGGCACAGAGATAGAAGTATTTATCAAACCAGAAGCTGATATAAAA  
GTTTTAGTGAAGAACAGACACTGTGGACAAAACATAGTGGGCAAGGTCTCATGCTCAGA  
GTCCCAGAGATGAAAAGGAATAATGTGGTTCTTTATAACAGTTAAGAGAGCTTGCCCTG  
TGAGCCATTACATTGAGATGCATCAGAACAAGTTTGGATGGCAGCTCCCTATCTTGA  
GGTAGTCAGTTTATATAACATCATTTGCCTCGTTGGGGACCATTAGGAATGAGACCCTG  
ATTAAGAAAGGTGTTCTAAGTTACTGGGTCTGGCGCAAGCAGTAATGATCCAACAAGTGC  
CAACTGAGTAAGTTTCTCTGTAGGGGACTTCGGTTTTTTGTTTTCTTTGTTTTGTTTT  
TTTTGCTGTCTTGTAGTTTTTTTTTAAATTAATGTAAATCTTATTGTTTTGTGGTGGA  
GTTACGGTATTAATTTTTTCCCTTTGGCTTTGGCCTTTTTGTCTCTATATGTTGGTACA  
TTCACATCTGTGAGATAATATCTCTGTCAATTTGTATGCAAAGTGTAAGAAAGAATGT  
AACCAAAAGAAAATCTACTAACTTGAGAACATAGTACAAAGAATGAAAAGCTTCTCTGT  
AGATGATGCTTCTTCTATTAGTACAGGGTCTTCTCCAAGCCTACGTAACAGGCATGAG  
TTCCTTTTATTAATACATTGCTCATTCTGTGTCTGCCTAAGATGTCCACAAAGCTTGT  
GAAGTCTAAAGTTAAGGGGCATGCGCTACAGGTTCTGACAACAGCATCTACCTTAGCTCT  
CGAATCTCCACCCTGCTACTGCTACCCACTTCTACAGTGGATGACGGAACCTAACAGTTG  
CCCTCTGCTGATTCTAACGTAGCTAGGTATGACCTCCATTTCCAAGAAGACAACCTTATA  
CAGAATAAAATCATATCTGAAGGTAACAGAACATAAGACAGTCCAGAGGCCATACATAC  
CATCTGTGGCAGCATCTCCAGAGGCACAAGTCAGTTCTCTGAGAAAAGCTTGGGCTTCTC  
ACTCTGTGCATGGTGAAGTAGAATGATGATGCGCAGGGTCCAGCTGATCTTATGAGAATT  
AGACATGGCAGGCATTATCATGGAGACTCTTCTCCAGGTTTCTGGATCATCTAAAGATG  
TCGACAACACATTTAAATTTGGCTGTTTCAAGATCAGAGTAACAAATTTAATACTTTTTGTG  
GGTGGTGGTGGTGGTGGTGGTGGTGGTGGTGGTGGTGGTGGTGGTGGTGGTGGTGGTGG  
TTTTGTTGTTGCTGTTTTGTTGTTGTTGTTGTTGTTGTTGTTGTTGTTGTTGTTGTTGTTG  
GATTCTCTGTAAACATCACTGAATGTCTAGAACTCATCTCATAGAACAGGCTGGCCTC  
AAACTTACAGAGGTCCACATGCCTCTCCCTCCGAGCTGGAATGAAGGGGTGCCCATGCC

CAGGCATTTAACACATCTTTAAAGAGAGTTTTGAGTTACTTTTATTGTTTATTTAGGCAT  
TCCTATCTGTTCCCTCTTGTCACATTTAATCCAGTTTCAACTACCACCTTCAAAATATAAT  
TTATCATTGTACTGGCTGGTTTTGTGTCAACTTGACACAAGCTAGAGTTATCACAGAGAA  
AGGAGCTTCAGTTGAGGAATGCCTCCATGAGATCCATCTGTAAGGCATTTTCTCAACTAG  
AGATCAAGGGGGAAGGGCCCCTTGTTGGGTGGTGCCATCCCTGGGCTAGGAGTCCTGGGTT  
TTATAAGAAAGCAAGCTGAGCAAGCCAGGGAAGCAAGCCAGTAAAGAACATCCCTCCATA  
GCCTCTGCATCAGCTCCTGCTTTCTGATTTGCTTGAGTTCCAGTCTTGACTTCCTTGGAG  
ATGAACAGCAGTATGGATGTGTAAGCTGAATAAACCTTTCCTCCCCAACTGCCTCTTG  
GTCATGATGTTTG

## Enam\_FIMO

| motif_id                                                                                                                                                                                          | motif_alt_id      | sequence_name | start | stop  | strand | score   | p-value  | q-value | matched_sequence  |
|---------------------------------------------------------------------------------------------------------------------------------------------------------------------------------------------------|-------------------|---------------|-------|-------|--------|---------|----------|---------|-------------------|
| 1                                                                                                                                                                                                 | HTTCTRGAAVNTTCKYM | 5             | 5325  | 5341  | -      | 12.4242 | 1.55E-05 | 0.363   | TTTCTGGAAGAATATCC |
| 1                                                                                                                                                                                                 | HTTCTRGAAVNTTCKYM | 5             | 6003  | 6019  | +      | 12.4121 | 1.68E-05 | 0.363   | TTTCTAGGAGCTTTGCA |
| 1                                                                                                                                                                                                 | HTTCTRGAAVNTTCKYM | 5             | 8584  | 8600  | -      | 11.8788 | 2.44E-05 | 0.363   | CATATAGAAAGTTCTTA |
| 1                                                                                                                                                                                                 | HTTCTRGAAVNTTCKYM | 5             | 4631  | 4647  | +      | 8.1697  | 6.15E-05 | 0.574   | ATCCTGGAAGTCTCATC |
| 1                                                                                                                                                                                                 | HTTCTRGAAVNTTCKYM | 5             | 17250 | 17266 | -      | 8.14545 | 7.36E-05 | 0.574   | CTTTTGGAAGCTCCTTT |
| 2                                                                                                                                                                                                 | DGAANDDDCN        | 5             | 8569  | 8578  | -      | 9.44242 | 7.72E-05 | 1       | GGAATTGGCC        |
| 2                                                                                                                                                                                                 | DGAANDDDCN        | 5             | 13852 | 13861 | +      | 9.44242 | 7.72E-05 | 1       | GGAAGGAGCA        |
| 1                                                                                                                                                                                                 | HTTCTRGAAVNTTCKYM | 5             | 5761  | 5777  | +      | 7.89091 | 8.98E-05 | 0.574   | TTTCTGACACTTTCTCT |
| 1                                                                                                                                                                                                 | HTTCTRGAAVNTTCKYM | 5             | 10322 | 10338 | +      | 7.89091 | 8.98E-05 | 0.574   | CTTCTAAAAGTTCCTAC |
| # FIMO (Find Individual Motif Occurrences): Version 5.5.6 compiled on Aug 4 2024 at 17:26:56                                                                                                      |                   |               |       |       |        |         |          |         |                   |
| # The format of this file is described at <a href="https://meme-suite.org/meme/doc/fimo-output-format.html#tsv_results">https://meme-suite.org/meme/doc/fimo-output-format.html#tsv_results</a> . |                   |               |       |       |        |         |          |         |                   |
| # fimo --oc . --verbosity 1 --bgfile --nrdb-- --thresh 1.0E-4 motifs.meme Enam.txt                                                                                                                |                   |               |       |       |        |         |          |         |                   |

>7 dna:chromosome chromosome:GRCm39:7:43528328:43537375:1  
CACACACACACACACACACACACACACACACACACACAAAGAGGGGTGGGAGAAAG  
AAAGATCTCAATTTCTTCTGGACCAAGCACTCTGGGTAAAGAATCTTCCAGTCTACTGT  
GTACAAACCCTGAAGGTAGATTGAGAAGCAAAGGAGTGCTCCCCAGTTAAGTAAATAATA  
GTAACCTATTGCTATGTCTGTTACTGTGACTCTGCCTATCAGTCTCCTCTCCCTGTCT  
GCCTCGGTGCTTGTGGTCCTATCTCTAACTCTACGTGCACCTGTTTAACCCCTCCATAGT  
GAATGAATATCACCAGCAAAAACAAGACACAGGAATCTGTCCTCAAAGACTCCCAGCTT  
AGGGGAAAACAGATGTTAGGAGAATTCACACACAAACAGAAACATGCATATGTTTTTCCA  
TGGTCTCTGAGAGATGTACGGTGTAAAGCTCCTACCCAGAATCCTCTAGTGAGGGATGAG  
TGTGAGGTTGTCATGTGTCCCTCCAGGTATGCGCTTCTGCTCTTCCCATCTGCAGATCTC  
CACGTCTCCATCTCTCTGAACCTTACGTCTTCTGTGGTCTGGCATCCCCAGTTCTCT  
TGGTTCACATTTGTCCCTTCTGTCTCTGAAGTGGATTCCCATCTTAGTGCAAATAACCC  
CAATATGTGAGACCAGAAATGTTCCAGTGCCTACATCCATAACTCTAGGTCACCTCCAC  
CTGACCCAGTGGGAAGACAGAAAAGCACCACCCACCTGTTTGCTCTTTGTCTTAGCTGGC  
CTCCCTGTATCAGTACTGGCCTCATCAATCAGGTGTGTACCTATGAGTCCCTGATAGAC  
CCAGTATGCCATTTGAATCCCAGACTTTCCACCAAACCCAGTATCTCCCTCCTGAAC  
TCCAGCATCTCCACCAGACCCAGCATCCCCCTCCTGGACCCAGCATCTCCCTCCTGG  
ACCCAGCATCTCCCTCCTGGACCTCAGCATCCCCCTCCTGGACCCAGCATCTCCCTCC  
TGGACCTCAGCATCTCCCTCCTGGACCTCAGCATCTCCCTCCTGGACTCCAGCATCTCC  
TCCTAGACTCCAGTATCTCCCTCCTGGACCTTAGCATCTCCACCAGACCCAGCATCTC  
CCTCCTGGACTTCCAGCATCTCCCTCCTGGACCCAGTATCCCTTTCTGGACCTCAGCAT  
CTCTCACCAGACCCAGTATCCCCCTCCTGGACCTCAGCATCTCCACCAGACCCAGC  
ATCTCCCTCCTGGACCCAGCATCTCCCACTTGAATCTCAGTGCTTTCCAGTCATGGTC  
CAGCCTTCAATCCCTACCTCTGTCTCTCCTACCAAGAGCAATTTACAAAGTAAGCAAG  
CCATGTCAATTCCTCTACCACTGAACCTTGATATCTAAGCCATTTCTGAAGGCTGCCTGT  
CTGCCTTGCTTCCCATGGGAATGTCATCCACGGACAAATGCCAAGACGTCTTCTGATGCA  
ACCTCACTTGTCTGGTTCCCACTCTTCTCATAGTCATCTGACTCGGACACTACCAACTA  
CCATTTATCTCTTGATTCTCTGTCTTCTTGATTGTACATCTCTCCCCCTGATCACC  
ACCGGAGTCCCAGGAACATGGAGAGATCACTTCTCCTAGTTCCTGACTTGATTTAGAATT  
CCAAGCATGAGAGCTGCCAATTGCTGTTGACTAAGGGGTGCCTCCATCACACCCTCGTTC  
CTAGGAGCCTCTGCACTAGGACATCTGCAGAGGGAGGATCTGTGTGCAGGGTTCTCTGAA  
TTCAGGCTGAGCATGGAGTGATGTTACCCAGATCCTATGCATGGGGAAAAGGAGATGGA  
GAGGTGGGTACAGATAAGATTTCCAAGGAAGTACGAGATGCAAGCTGGATTTGGTGTCTG  
GGGCAGTTTTTCCAGAGGACGAACAGAAGGACACAGAGGGAGACTACGGGAGTGAGGTAGGG  
GGAATTTTCAATTTAGTGAGTAAATGAGCCTGAGAGAAGGAAAGGATGAATGAAAGAACAT  
GAGGGGGGGCAAGGGAGGGGGAAGAATAAAGGCCAGAGAGGCTGGGGTCTGGACACTGTT  
CCCTCCCTGTGCCCCAGACTCCACCTGACTTGGAGGCAGCCTGAAGGCTTTGAGCTGGAG  
CCTGCAGCATCTGACGTATGGAATGTGTCCCCTGGGGGGCAGGCCAGCCCCAGCTGAGGA  
AGCTTATAAGCCCCATAGGGGCCCTGTGGGTAGCAAACCAGCTCAGCTTAGCTCAGCTC  
AGCCGCAGAATTCGGAGCCAGAAAGCAGCAGGTGAGACACACACACACATTCTCTCTC  
TCTCTCTGCTCTCACACTCTCTGTTTGAAGCATCCCTGCATTCTCTCTGAACCTCTG  
GCTCTGATCTCTGCCTCTCAGACTGCCTCCAACCAGATAGGTCTCTTGAATGCCCTGTCA  
GGGTCTTCTATCTGTCTAAGTGAAGCCCTGTCGGGGTCTTTCATCTGTCTAAGTGAAG  
ATCTATGCCTCCATTTCTCCACACCCCCACCCATCCCTAGATAGATGCTTCTCCCTCCTC  
CTCCTCCTTCTCTTCTCCTCCCTTTTACTTCTTCCCCCTTCTCTGTCTCTTCTATC  
CGGTACATCCCACAAATGAAAAAGGCAAGGGAGAGAGATCATGGGGAGGCAGGGAGTAA  
GACTACCGTCCAGATTCATTGTTGTCTTCAATTTCCAGGAGCCAACATGATGGTCACTGCA  
CGAACCCCTGGGGCTGGTTCTGGGGTGCCTCATCCTTGAGGTACAGGTATCTGAGTG  
TGTGTGTATGGTGTGTGCCCGAGTGAACAGTGTGAGCCAACAGCAGGACTCAGTGTCT  
ACTGTTTCTGACTCTCTGATGTGGCAGTATGATGTGACTGTGTGTGGTTCATGGCTGTA  
GGGTGACAGGTCTGAGAAGGAGAGACAGTCTTAGTGGTACCACTAAGGGGAAGACGGGA  
TCTGTGCCAGTTCTGAGTACTAGTTGATTCTTTCCGTAAACTCCCTATGTACAACA  
GGCTAGTCTCAAACCTTTCAGAAGTCAAGCTGCCTCTGCCCTGAGTGCTAGAGTTGATAC  
CTGACCCACTTATTTATTTTTAAGAGTCTTACTTAGTCCAGGCTGGCCGTGAATCACT

AAGCAGCCAAGAACATCCTTAGATTTCCAATCCTTCTGCCTCTGCCTAAGTGCTGGGGTT  
ATAGGTATGTACCACTATACCCAGTTTACGTGGTGCTGTAGTGCTGGGATCCAAACCCAA  
GACTTTGTGCATGCTAAGCCAGCACTCCCTCCCAGCCCCCTCTGGGATAAAGATGTTGCC  
TGGGTGAATGGGCTGTGGCTGGGTGTGCCTGAGGGGAGGTGCATGGAAGCACAGCCGTGC  
CACAAAAGCTGAACAGCTCCTGAAGTCGTGACTGTGTGTGAGGGAGAAATGGTTCCTGGG  
TCCTGAAGATCAGCCTGAGAATCCAAGCTGACCCGTCTTCCTGACAAATGACCCTACATC  
CAGTGTGCTGATGATCCTGGCTCCCAGACTAAGGAGGCTCCTGGCTTTAACTCCTCTCAA  
GGGACCTAACTCCACCCCTCTGAGCCCTGACCCGGAGCCCTCTCAGTCTGACTCCACCC  
CTCTGAACCCTGACTCCACCCTGAAGTTCTCAGACCACTCCAGTACCAGTTGCTTGGTG  
ACTGAAGACTAGTCCCATGTCCTATATCCTGAATCACCATCTAGTCTGACTCTGCCAGC  
CCCTTACCCTAATTCTCCTCTCTCTGGCCCTGGCCTTTATGAACTCTGAAGCTTACCC  
ATACTCCTGTTCTCAAACTCGGTCCCTAAGAACCAGCCTCTTTGCCTGTCCCAGACATT  
CCCACATCCCTGAAGTACGACCTTGTCCTCAGATCTGCCAGCTTATGTGGTGAACCCTA  
AGCCTTCTCAGGAGGCAGATACCAAGGTCTCTACATTGACACCCTGCTATGATGAGCCCT  
GCCTGCAACCAGTCCAGACTCTTGCCCTCAACCACTCAGCTTAAAGCAGTTTCTTCCCC  
TTTTCCATGACACCTCCCCTGAGACCTGGGAAGCCCCAGCCACATTTCTGCTCTGAACT  
CTCCCTGGTCCAGCGCCCTCATTCTGTCCCAGCCCTGGCTCCACCCCTGAAAGCCTGGA  
CAAGCCCCTGCACTAAATCTTACCTCGAGAGACAGCGAGGCTGTGTCTGAACCTGTCTC  
TAGCAATGACCCAGACCCTAAAACCTAATTCATCCCCAACTCTTAACCAAGTCTTAA  
CTTTGATATCCTACCCTTAGGAGCCCTAATCCTACCTCTTGAAGTGGTTCCTACCATGA  
CCTCCCCCTGAGGCTCTAACCACTCCCCTTCACTCATAACCCTGTGGGAAAGAACTCTAAT  
CCAGGATTCATAGCTTGTTCAGTCTCGACCCTACCTCCTCCCCACCCACCCCGCAA  
CAACACCCACCCACCCACTGCAACCTCTGATTACGTCCCTTCACTCAAACATCACCCCA  
TAGCTCTGAGCTCTCATCTGGACCCTGCTCCCATCCCAGAAGCCTTGAAACGCCCTGCT  
CCACACCCTCCCAATCCTGACTCCATCCCTAGGAGCCTCCGCCTCAAGTGTGAGCAGCCG  
GATCATAAAGGCCAGGACTGCTCCCACACTCGCAACCCTGGCAGGCGGCACTGTTCTC  
AGAAGACGGTTTTTTCTGCTCGGGAGTCTTGGTGCATCCGAGTGGGTGCTGTGAGCAGC  
ACATTGCTTACAGGAGTGAGTCGGGGTGGTAGGGCAGGATGCTGAGGGGAGGGGTTCAA  
TATCACACGCGGCCTGCAGAGGGCGCGCAAGTGGCCACAGTGTGAGGGGAACCCAAACC  
TAAGGGACAGGGCAGTCTAGGGGAAGGGAAAGGCGAAGCAGGAGATCGCTGTTGCTTTAG  
GGTGGAGGATGAGTTGGGAGATATAGGTGCCACTGTATACTCACCTTCTGGGTGATCCTC  
AGGTCCTACATCGTGGGACTGGGCCTGCATAACCTGAAAGGCTCCCAAGAGCCTGGCAGC  
CGGATGTTAGAGGCCACCTCTCCATCCAGCACCCCAACTTCAACGATCCTTCTTTTGCA  
AACGATCTCATGCTCATCAAACCTGAACGAGTCAAGTATAGAGTCTAACACTATCAGGAGC  
ATCCCTGTGGCTACCCAATGCCCCACTCCTGGAGATACCTGCCTAGTCTCTGGTTGGGGT  
CAACTAAAGAATGGTAAGCTGCTGGGAACAGGGTTGCCCTCTCTGAGAAGTTCCCCACAC  
AGCCAAAATGGACTGACCCTCCATTGTGTGCCCCAGGGAACTGCCAGCCTCCTGCAGT  
GTGTGAATCTCTCAGTGGCGTCAGAGGAGACTTGCCGGCTGCTGTATGACCCTGTGTACC  
ACCTCAGTATGTTCTGCGCTGGAGGAGGACAGGACCAAAAGGACTCCTGCAATGTGAGAC  
TCGGGGAGGGTGAACAGAGACGAGGACAGGGAGGTGCAGAAGGTACACCCAAGGCACACT  
GAGGTAGACTGTGAGACATGGGGGAGCCACCGCTTAACTCTCAGCAGGGTAGGCAGAGTC  
AGGTGATGTCTGTGAGTTCAAGACCAGCCAGATATACACAGTGAGACCCTTTCTCAAAAA  
GAGGAGGAGATGGAGGAAGAGAATGGGGTAGGGGAGGAAAGAGGATCAAGGAGGCAGAGA  
CCCAGAAGCCAGGCATAGTGGTTCAAACCTATAATCGTAGCCATTAGTCCCTCCCACAG  
TGAGGAGATAGGGCGTGGCTCAGGGGTAGAGCACCTCAATAAAGGCACTGGGTTTTGCTT  
CCAGTACTACAAACAAACAAACAAACAAACAAACAAACAAACAAACAAACAAACAAACAAAC  
AAACAGAAATAGCCATTCTGAGAAAAAGTAAAAACGAAGGAAACACAGACACACACAGAA  
CACAAAGACACAGTGTAGGCAGAAAAGCCCTGAAGGAGACAGACAGATAGACAAGGCAAG  
TAACAAGCCCCAGGAAAGCAGCCAGTTGTGTGGACACAGGGCTCTGGCAAGGGTATGCGG  
CTGGTTTTCTTCTGTCTCTGTCTACAATGCTTACTTACGGGGATGCTCTGAGACTTTCTG  
CTCATGCCCTCCTGGATTCTGACTCTCTCCTCACCCTCCCCTTCCCCCTCACCCCTC  
TCCCTCTCTCTCCACCTCCGTTTCACTTCCCCCTCCCCTCTCCTCCTTCCATTCC  
CCTCCCTTCTCCCCCTTTTCTCTCTCAGGGGACTCTGGGGTCCCATAGTGTGCAAC  
AGATCCCTACAAGGGCTCGTGTCTATGGGACAAGGAAAGTGTGGGCAGCCTGGCATAACA



AGTGTCTACACCAATCTCTGCAAGTTCACCTAACTGGATCCAGACCATCATTGAGACAAAC  
TAGCTATGGACTGACTACAAGGCCACATGAAGCCTGCTGAGGGAACCTGAGACTCAGGA  
TTGCTCCTAGCCCTTCTCCCTCAGATCTACAAGGTCAGGCCCTAGCCTCCTCCCTCAGAC  
TCACAAGTCCAGACTCCAATCTCCTCCCTCAGACCCACAAGTCCAGACTCCAATTTCTC  
TCTCAGATCCAAGGATTCAGACCACAATACCCTCTTTCAGATTTCAGGGATCCATGCCACA  
ACCTCCTCCCTGGAACACAGGAGTGAACCCACCTGCATTTTCTCTGTGTGCAGTGTCC  
TCTAGTAGCCAGTATTGACCCAGCCTTGCCTTTGTACCCTTAGGCTTGTTCCTCCCTC  
CAAACACCTTATGCCTGTCTCCTCAGGGATCCACAAATAAAAGACCTCTCAGTTCTGTTT  
GAAGTATCCTCTTCGTCCCTTTCCACTCAAGGGATATACCAACACATGGCTTTTCTCTT  
GGCTTCCCATCTGTGCAATGAGAATGTAAACCAGGAGGCCCTGGCTTTTGATGCAGCAG  
CCTGTGTGAGTGTGTAAGAGACACCCATTCCATGATGTCTCTCATTTCAAAAGGGG  
GATTTCCAGCTTTACAGCTTCTGTTGTGATTGGTCTGCTTTTGGTTTTGTCTTTGATTT  
TAAGATCTACTTCTACTTTTATTTCTGTGTATTTGTGTGTGTGTGTGTGTGTGTGTG  
TGTGTGTGTGTATGTACAAGCACACACGCTTGTGTAAGTGCAGTGGCCATGGAGACCAGA  
AAAGGGCAGCATATCCCTGGAGCTGGAGTTACGGGGGCTGTAAGCCGCTGAACATGGTT  
GCTGGGAATCCAATCTCCATTTTCTGCGGAGCAGCCGGTGTCTCAACCATGCAGCCAT  
CTCTCAAGCCATTTTTTGTCTTCTCACACTTTAAGAACGTTTCTCTGTACCTGTCTCAG  
GACCCAGCTGCTATTGCTGGAGCTGATGGAAAAAAAATCTAAGATGCCTGCTGTGAGAC  
CCTGAGACAGAGACAGGACACACTCAGCACCCGTAATAGGAGGAATTGCTATTAAGCTCC  
TCATTAATAAATTATACCAGTAAAGTGGTGCATATCACATATCTGGAGTACAAGCTGAGG  
TAGGGAGAGGAAGAGTTCAAGGCCATTCAAACAAACAAACCAGATAGGTAGGTAGGTAG  
GTAGGTAGGTAGGTAGGTAGATAGATAGATAGATAGATAGATAGATAGATGATTGATTTT  
TGTGCCTACAAAGGAAGTATAAAACTTTGCGCCGCTATGTATTTAGTCTTGTGTGCTT  
TATTTTGTTTTGTCTTTGAAACAGAACCGTAGGTAGCCCAGGCCGGCCTGGGCTTCATTAT  
GCAGCTAAGGATGAGCTTAACTTTCTGACCCTCCTGGCTGCACCTCCAAGCGCTGGGAT  
GACAGGTGTGCGCCACCACACCCGACTATCAAAAATGTTTATGTATCATTAAACAGATTCT  
CAGACAGATGAAATATGGAGTAAGTTACTAAAGGTAGCATCAACAAGTTCCTCGTCATTG  
AAGAGTTTACAGTGACTTGGAGAAAATGACAGAAAGACCAGCCGAGACAGAAATGAGTG  
GGTGTGTGCAATGATTCACACAGTGTGATCCGCACACCTGTGAAACAGTGCATCCTCTG  
TCTGCAGAACACACAACCTCCTCACATGCACACACCTACCAAGATTGCTGACACTGCAGAA  
TGTAACCAGCTCAAGTGTCAATTATACTCAGAGCAGGAACTTTAGGGAGATTTTAAATG  
GCACACCAAGTTAGAAAACAATCTAGCAGATTCTTTTTCAAAGTGTGTGTGTGTGTGTGT  
GTGTGCATGCATGTGTGACTATTGCTGTACGTGTACCACAACACATATGTGAAGATCAGA  
AGACTGCCTTGAGTGCTGGTCCTTCCACCTTGAGGCAGAGTCTCTTGTGTTGCTGCCATAG  
TCAGCAGGCCAGCTTCTAGGAATTCTCCTGTCTCTACCTCCCATCTCACCATAACAAGTGC  
TGGGATTACAGTTGCAGACACTATTTTGTCTAGCTTTTCTGTGGGTGCTGGGGACCATCA  
ATGGTTGCACAGCAAGTATTTACAGGGGGGGCATCTTTCCAGCCCTCTAGCAGATTCTT  
GCACATGCATCTGCTTGTGTTTACTTTTACCTCCAGTTATTTACCGGAGATCTGTG  
GGGAAAATAAAAATAGAAGCCCTGCTTAGGAATGGGGAAGGCAACTAAGTAGAGTGCTT  
ACCTTCCAGGCATGGAGCCCTGGGTCCCATCACCACACTGTATAAGCTGGGCGTGCTGGA  
ATAAGCCCATAACTCCAGTACTTGGGAGGCAGAGGTAGCAGGATCAGGAGTTCAAGACAG  
TCCTCAGTTACTTGCTAGTTAATGCCAGTCTGGGCTGTGTGAGACCCTGTTGTCCCTT  
CCCCTTATCACACAAATGTTTTACTTAGAAATCAGGTTGGAAATAGCTCAAGTGTGTGCA  
GTTAGTGAATGACATAGGGACCTGGGATGAAATGGATCATGCAGTGAG

## Klk4\_FIMO

| motif_id                                                                                                                                                                                          | motif_alt_id      | sequence_name | start | stop | strand | score   | p-value  | q-value | matched_sequence  |
|---------------------------------------------------------------------------------------------------------------------------------------------------------------------------------------------------|-------------------|---------------|-------|------|--------|---------|----------|---------|-------------------|
| 1                                                                                                                                                                                                 | HTTCTRGAAVNTTCKYM | 7             | 8060  | 8076 | -      | 8.44242 | 4.6E-05  | 0.49    | TTTCTGTCATTTTCTCC |
| 1                                                                                                                                                                                                 | HTTCTRGAAVNTTCKYM | 7             | 4575  | 4591 | +      | 8       | 7.5E-05  | 0.49    | CATCTGGACCCTGCTCC |
| 2                                                                                                                                                                                                 | DGAANDDDCN        | 7             | 3778  | 3787 | -      | 9.44242 | 7.72E-05 | 0.687   | TGAAGGGGCT        |
| 2                                                                                                                                                                                                 | DGAANDDDCN        | 7             | 8933  | 8942 | -      | 9.44242 | 7.72E-05 | 0.687   | GGAAGGGACA        |
| 1                                                                                                                                                                                                 | HTTCTRGAAVNTTCKYM | 7             | 8625  | 8641 | +      | 7.90303 | 8.13E-05 | 0.49    | CCTCTAGCAGATTCTTG |
| # FIMO (Find Individual Motif Occurrences): Version 5.5.6 compiled on Aug 4 2024 at 17:26:56                                                                                                      |                   |               |       |      |        |         |          |         |                   |
| # The format of this file is described at <a href="https://meme-suite.org/meme/doc/fimo-output-format.html#tsv_results">https://meme-suite.org/meme/doc/fimo-output-format.html#tsv_results</a> . |                   |               |       |      |        |         |          |         |                   |
| # fimo --oc . --verbosity 1 --bgfile --nrdb-- --thresh 1.0E-4 motifs.meme Klk4.txt                                                                                                                |                   |               |       |      |        |         |          |         |                   |
